# Supplementary material
Source: Royal Society of Chemistry journal article supplement (doi:10.1039/d6cc01367h)
Supplement: d6cc01367h1.pdf [file d6cc01367h1.pdf]

Supplementary Information

**Exploration of naphtho[*c*]dithiophenes: synthesis, optical and electrochemical properties of naphtho[1,2-*c*:5,6-*c'*]dithiophenes**

Yuki Okazaki, Shogo Amimoto, Kumpei Kozuka, Satoru Maekawa, Keiichi Imato and Yousuke Ooyama\*

Applied Chemistry Program, Graduate School of Advanced Science and Engineering, Hiroshima University, 1-4-1 Kagamiyama, Higashi-Hiroshima 739-8527, Japan

E-mail: yooyama@hiroshima-u.ac.jp

## Experimental Section:

### General

Melting points were measured with an AS ONE ATM-02. IR spectra were recorded on a SHIMADZU IRTracer-100 spectrometer by the ATR method.  $^1\text{H}$  and  $^{13}\text{C}$  NMR spectra were recorded on a Varian-400 or -500 FT NMR spectrometer. High-resolution mass spectral data were acquired by APCI on a Thermo Fisher Scientific LTQ Orbitrap XL. Photoabsorption spectra were observed with a SHIMADZU UV-3600 plus. Fluorescence spectra of solutions and solids were measured with a HORIBA FluoroMax-4 spectrofluorometer. The fluorescence quantum yields in solution and in solid state were determined using a HORIBA FluoroMax-4 spectrofluorometer with a calibrated integrating sphere system. Fluorescence decay measurements were performed on a HORIBA DeltaFlex modular fluorescence lifetime system, using a Nano LED pulsed diode excitation source (370 nm). Cyclic voltammetry (CV) curves were recorded in DMF/ $\text{Bu}_4\text{NClO}_4$  (0.1 M) solution with a three-electrode system consisting of  $\text{Ag}/\text{Ag}^+$  ( $\text{AgNO}_3$  in acetonitrile/ $\text{Bu}_4\text{NClO}_4$ ) as the reference electrode, a Pt plate as the working electrode and a Pt wire as the counter electrode using an Electrochemical Measurement System HZ-7000 (HOKUTO DENKO).

### Synthesis

#### 2,6-Dimethylnaphthalene-1,5-dicarbaldehyde

To a diethyl ether (25 mL)/toluene (75 mL) solution of 1,5-dibromo-2,6-dimethylnaphthalene (3.85 g, 12.3 mmol) under a nitrogen atmosphere at 0 °C was added dropwise a 1.6 M hexane solution of *n*BuLi (38.3 mL, 61.3 mmol). After stirring for 1 h at 0 °C, the reaction mixture was allowed to warm to room temperature and stirred for a further 2 h. Then, *N,N*-dimethylformamide (7.58 mL, 98.4 mmol) was added dropwise. After stirring for 1 h at 0 °C, the reaction mixture was quenched with  $\text{NH}_4\text{Cl}$  aq, and then the solution was extracted with ethyl acetate. The ethyl acetate extract was concentrated under reduced pressure. The residue was chromatographed on silica gel (dichloromethane as eluent) to give 2,6-dimethylnaphthalene-1,5-dicarbaldehyde (1.10 g, yield 42 %) as a yellow solid; m.p. 173–174 °C; FT-IR (ATR):  $\tilde{\nu}$  = 3095 (aromatic C–H str.), 2956 (methyl C–H str.), 2929 (methyl C–H str.), 2872 (methyl C–H str.), 1670 (C=O str.)  $\text{cm}^{-1}$ ;  $^1\text{H}$  NMR (500 MHz,  $\text{CDCl}_3$ ): 2.82 (s, 6H), 7.49 (d,  $J$  = 8.9 Hz, 2H), 9.14 (d,  $J$  = 8.8 Hz, 2H), 10.93 (s, 2H) ppm;  $^{13}\text{C}$  NMR (125 MHz,  $\text{CDCl}_3$ ):  $\delta$  = 19.66, 128.60, 130.45, 130.94, 132.60, 142.44, 193.50 ppm; HRMS (APCI):  $m/z$  (%):  $[\text{M}+\text{H}]^+$  calcd for  $\text{C}_{14}\text{H}_{13}\text{O}_2$ , 213.0910; found 213.0907.

#### 1,2,5,6-Tetramethylnaphthalene (1)

A solution of 2,6-dimethylnaphthalene-1,5-dicarbaldehyde (0.50 g, 2.36 mmol) and hydrazine monohydrate (0.45 mL, 9.44 mmol) in diethylene glycol (25 mL) was stirred for 30 min at 110 °C. Next, potassium hydroxide (1.54 g, 28.3 mmol) was added to the reaction mixture, and the reaction mixture was stirred at 150 °C for 2 h. The reaction mixture was quenched with 10% HCl aq, and then the solution was extracted with dichloromethane. The dichloromethane extract was concentrated under reduced pressure to afford **1** (0.303 g, yield 70%) as a white solid; m.p. 112–114 °C; FT-IR (ATR):  $\tilde{\nu}$  = 3066 (aromatic C–H str.), 2920 (methyl C–H str.), 2862 (methyl C–H str.)  $\text{cm}^{-1}$ ;  $^1\text{H}$  NMR (500 MHz,  $\text{CDCl}_3$ ): 2.48 (s, 6H), 2.59 (s, 6H), 7.30 (d,  $J$  = 8.7 Hz, 2H), 7.83 (d,  $J$  = 8.6 Hz, 2H) ppm;  $^{13}\text{C}$  NMR (125 MHz,  $\text{CDCl}_3$ ):  $\delta$  = 14.88, 20.72, 121.50, 128.93, 131.59, 131.69, 131.78 ppm; HRMS (APCI):  $m/z$  (%):  $[\text{M}+\text{H}^+]$  calcd for  $\text{C}_{14}\text{H}_{17}$ , 185.1324; found 185.1322.

#### 1,2,5,6-Tetrakis(bromomethyl)naphthalene (2)

A solution of **1** (1.93 g, 10.5 mmol) and *N*-bromosuccinimide (7.48 g, 42.0 mmol) in carbon tetrachloride (300 ml) was stirred at room temperature under ambient light. After 3 h, to a reaction mixture was added Na<sub>2</sub>S<sub>2</sub>O<sub>3</sub> aq, and then the solution was extracted with dichloromethane. The dichloromethane extract was concentrated under reduced pressure. The residue was dissolved in dichloromethane, and then compound **2** was recrystallized from dichloromethane solution as a white solid (2.03 g, yield 40 %); m.p. 238–240 °C; FT-IR (ATR):  $\tilde{\nu}$  = 3026 (aromatic C–H str.), 546 (C–Br str.), 2862 (methyl C–H str.) cm<sup>-1</sup>; <sup>1</sup>H NMR (500 MHz, CDCl<sub>3</sub>): 4.75 (s, 4H), 5.06 (s, 4H), 7.5936 (d, *J* = 11.0 Hz, 2H), 8.15 (d, *J* = 11.0 Hz, 2H) ppm; <sup>13</sup>C NMR (125 MHz, CDCl<sub>3</sub>):  $\delta$  = 25.19, 29.98, 125.69, 129.33, 132.27, 133.05, 135.55 ppm; HRMS (APCI): *m/z* (%): [M<sup>+</sup>] calcd for C<sub>14</sub>H<sub>12</sub>Br<sub>4</sub>, 499.7626; found 499.7637.

### **1,3,6,8-Tetrahydronaphtho[1,2-*c*:5,6-*c'*]dithiophene (3)**

An ethanol solution (100 mL) of Na<sub>2</sub>S (0.937 g, 12.00 mmol) was refluxed, and a ethanol solution (150 ml) of **2** (1.00 g, 2.00 mmol) was added dropwise. After stirring for 3 h, the solution was evaporated. The resulting residue was dissolved in dichloromethane and washed with water. The dichloromethane extract was concentrated to afford **3** (0.21 g, yield 44 %) as a white solid; decomp.p. 228–230 °C; FT-IR (ATR):  $\tilde{\nu}$  = 2912 (methylene C–H str.), 2841 (methylene C–H str.), 736 (C–S str.) cm<sup>-1</sup>; <sup>1</sup>H NMR (500 MHz, CDCl<sub>3</sub>): 4.48–4.49 (m, 4H), 4.67–4.68 (m, 4H), 7.44 (d, *J* = 8.5 Hz, 2H), 7.68 (d, *J* = 8.4 Hz, 2H) ppm; <sup>13</sup>C NMR (125 MHz, CDCl<sub>3</sub>):  $\delta$  = 37.84, 39.44, 123.60, 124.15, 129.29, 136.35, 137.55 ppm; HRMS (APCI): *m/z* (%): [M-H]<sup>+</sup> calcd for C<sub>14</sub>H<sub>11</sub>S<sub>2</sub>, 243.0296; found 243.0295.

### **1,3,6,8-Tetrahydronaphtho[1,2-*c*:5,6-*c'*]dithiophene 2,7-dioxide (4)**

To a THF (180 mL) solution of **3** (0.664 g, 2.72 mmol) was added dropwise a water solution (90 mL) of NaIO<sub>4</sub> (2.32 g, 10.9 mmol) at room temperature. After stirring for 19 h, the solution was extracted with dichloromethane. The dichloromethane extract was concentrated to afford **4** (0.445 g, yield 59 %) as a light-yellow solid; decomp.p. 178–180 °C; FT-IR (ATR):  $\tilde{\nu}$  = 2964 (methylene C–H str.), 2912 (methylene C–H str.), 1016 (S=O str.) cm<sup>-1</sup>; <sup>1</sup>H NMR (500 MHz, CDCl<sub>3</sub>): 4.32–4.71 (m, 8H), 7.55–7.58 (m, 2H), 7.80–7.82 (m, 2H) ppm; <sup>13</sup>C NMR (125 MHz, CDCl<sub>3</sub>):  $\delta$  = 58.78, 59.05, 60.63, 60.84, 125.11, 125.57, 130.87, 132.47, 133.48 ppm; HRMS (APCI): *m/z* (%): [M+H]<sup>+</sup> calcd for C<sub>14</sub>H<sub>13</sub>O<sub>2</sub>S<sub>2</sub>, 277.0351; found 274.0348.

### **Naphtho[1,2-*c*:5,6-*c'*]dithiophene (N[c]DT-1)**

To a THF solution (50 ml) of **4** (0.380 g, 1.38 mmol) under a nitrogen atmosphere at –80 °C was added tetramethylethylenediamine (2.46 mL, 16.5 mmol). After stirring for 30 min, a 1.6 M hexane solution of *n*BuLi (2.46 ml, 16.5 mmol) was added dropwise for 30 min. After stirring for 2 h at room temperature, the reaction mixture was quenched with water, and then the solution was extracted with dichloromethane. The dichloromethane extract was concentrated. The residue was chromatographed on silica gel (dichloromethane : hexane = 1 : 1 as eluent) to give **N[c]DT-1** (0.176 g, yield 53 %) as an yellow solid; decomp.p. 140–142 °C; FT-IR (ATR):  $\tilde{\nu}$  = 3103 (aromatic C–H str.), 763 (C–S str.) cm<sup>-1</sup>; <sup>1</sup>H NMR (500 MHz, CDCl<sub>3</sub>): 7.69 (d, *J* = 8.9 Hz, 2H), 7.75 (d, *J* = 3.2 Hz, 2H), 7.91 (d, *J* = 9.0 Hz, 2H), 8.08 (dd, *J* = 3.2, 1.0 Hz, 2H) ppm; <sup>13</sup>C NMR (125 MHz, CDCl<sub>3</sub>):  $\delta$  = 115.20, 118.07, 121.41, 121.43, 123.47, 136.53, 137.31 ppm; HRMS (APCI): *m/z* (%): [M+H]<sup>+</sup> calcd for C<sub>14</sub>H<sub>9</sub>S<sub>2</sub>, 241.0140; found 241.0138.

To a THF solution (5 mL) of **4** (0.021 g, 0.076 mmol) under a nitrogen atmosphere at 0 °C was added dropwise a 1.3 M THF solution of lithium hexamethyldisilazide (0.70 mL, 0.912 mmol). After stirring for 3 h, the reaction mixture was

quenched with water, and then, the solution was extracted with ethyl acetate. The ethyl acetate extract was concentrated. The residue was chromatographed on silica gel (dichloromethane : hexane = 1 : 1 as eluent) to give **N[c]DT-1** (0.005 g, yield 30 %) as a yellow solid.

### 1,3,6,8-Tetrakis(*tert*-butyldimethylsilyl)-naphtho[1,2-*c*:5,6-*c'*]dithiophene (**N[c]DT-Si4**)

To a THF solution (3 mL) of **N[c]DT-1** (0.030 g, 0.125 mmol) under a nitrogen atmosphere at 0 °C was added dropwise a 2.0 M THF/heptane/ethylbenzene solution of lithium diisopropylamide (0.75 mL, 1.50 mmol). After stirring for 3 h, a THF solution (3.0 mL) of *tert*-butyldimethylsilyl chloride (0.226 g, 1.50 mmol) was added dropwise. The reaction mixture was further stirred for 15 h. The reaction mixture was quenched with water, and then, the solution was extracted with dichloromethane. The dichloromethane extract was concentrated. The residue was chromatographed on silica gel (dichloromethane : hexane = 1 : 1 as eluent) to give **N[c]DT-Si4** (0.044 g, yield 49 %) as a yellow solid; decomp.p. 218–220 °C; FT-IR (ATR):  $\tilde{\nu}$  = 2953 (methyl C–H str.), 2962 (methyl C–H str.), 2881 (methyl C–H str.), 2854 (methyl C–H str.), 1359 (aromatic C–Si str.), 1247 (aliphatic C–Si str.), 767 (C–S str.)  $\text{cm}^{-1}$ ;  $^1\text{H}$  NMR (500 MHz,  $\text{CDCl}_3$ ): 0.56 (s, 12H), 0.68 (s, 12H), 0.96 (s, 18H), 1.00 (s, 18H), 7.78 (d,  $J$  = 9.3 Hz, 2H), 8.29 (d,  $J$  = 9.2 Hz, 2H) ppm;  $^{13}\text{C}$  NMR (125 MHz,  $\text{CDCl}_3$ ):  $\delta$  = –3.65, –0.34, 18.39, 19.30, 26.92, 28.01, 121.37, 124.69, 125.85, 134.96, 135.58, 144.89, 146.41 ppm; HRMS (APCI):  $m/z$  (%):  $[\text{M}+\text{H}]^+$  calcd for  $\text{C}_{38}\text{H}_{65}\text{S}_2\text{Si}_4$ , 697.3599; found 697.3597.

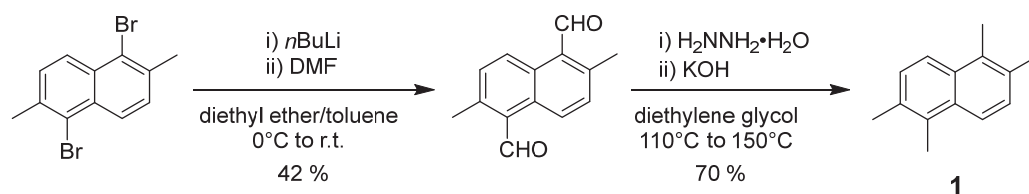

**Scheme S1** Synthesis of 2,6-dimethylnaphthalene-1,5-dicarbaldehyde and **1**.



(a)

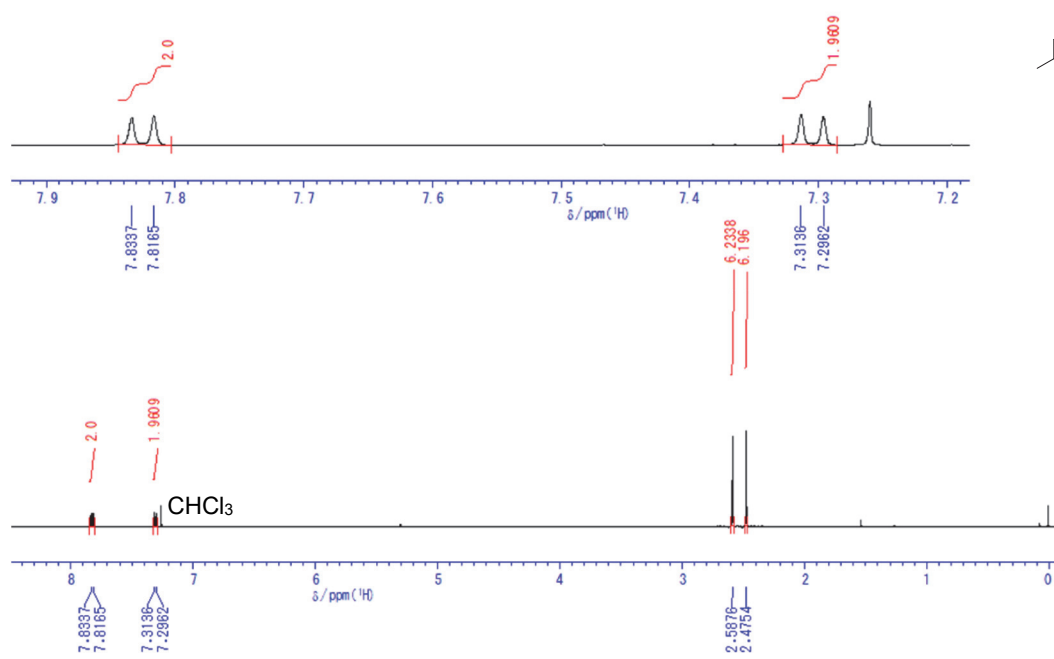

(b)

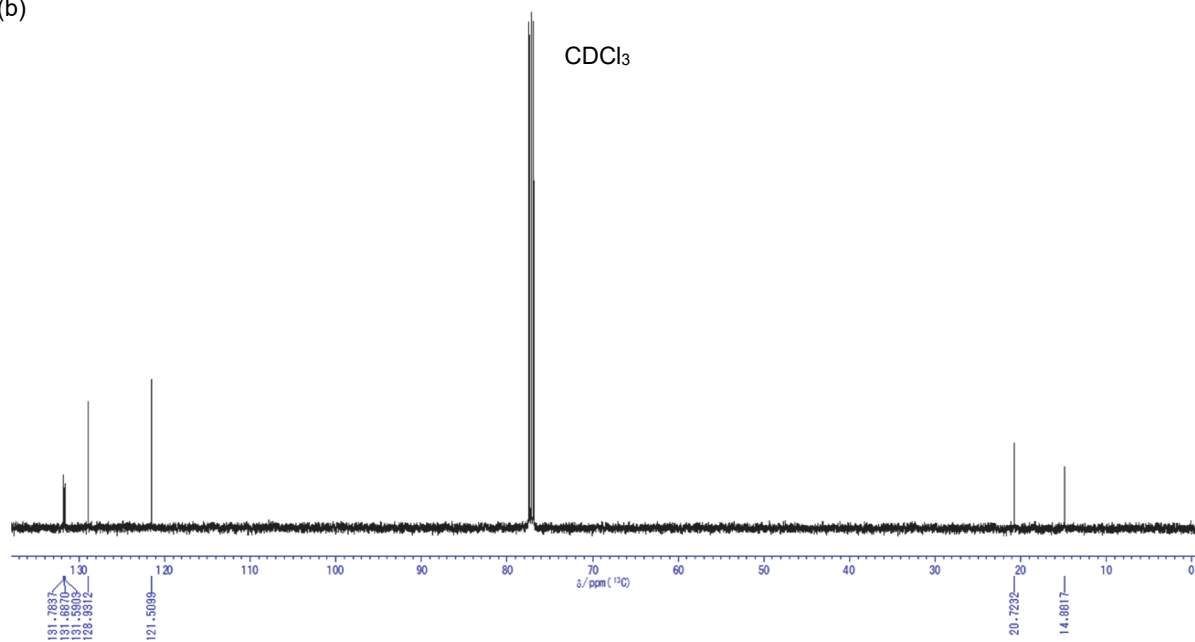

**Fig. S2** (a) <sup>1</sup>H NMR (500 MHz) spectrum of **1** in CDCl<sub>3</sub>. (b) <sup>13</sup>C NMR (125 MHz) spectrum of **1** in CDCl<sub>3</sub>.

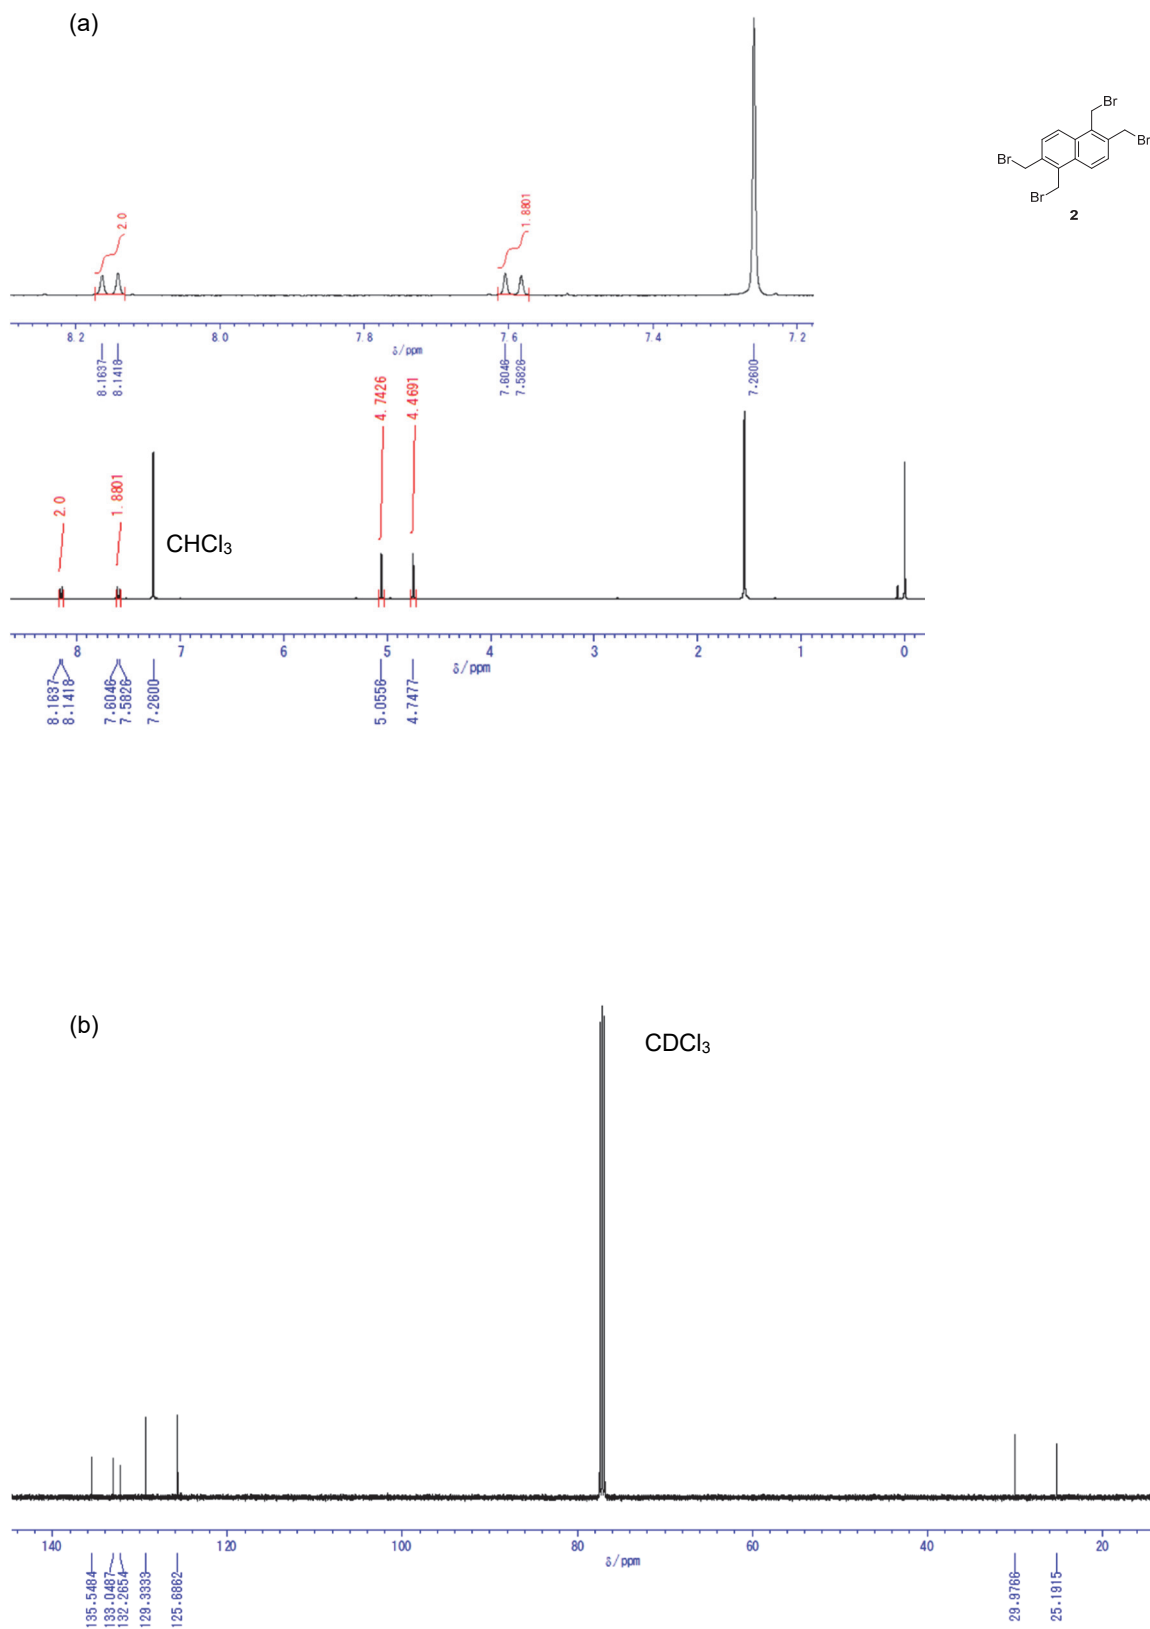

**Fig. S3** (a) <sup>1</sup>H NMR (500 MHz) spectrum of **2** in CDCl<sub>3</sub>. (b) <sup>13</sup>C NMR (125 MHz) spectrum of **2** in CDCl<sub>3</sub>.

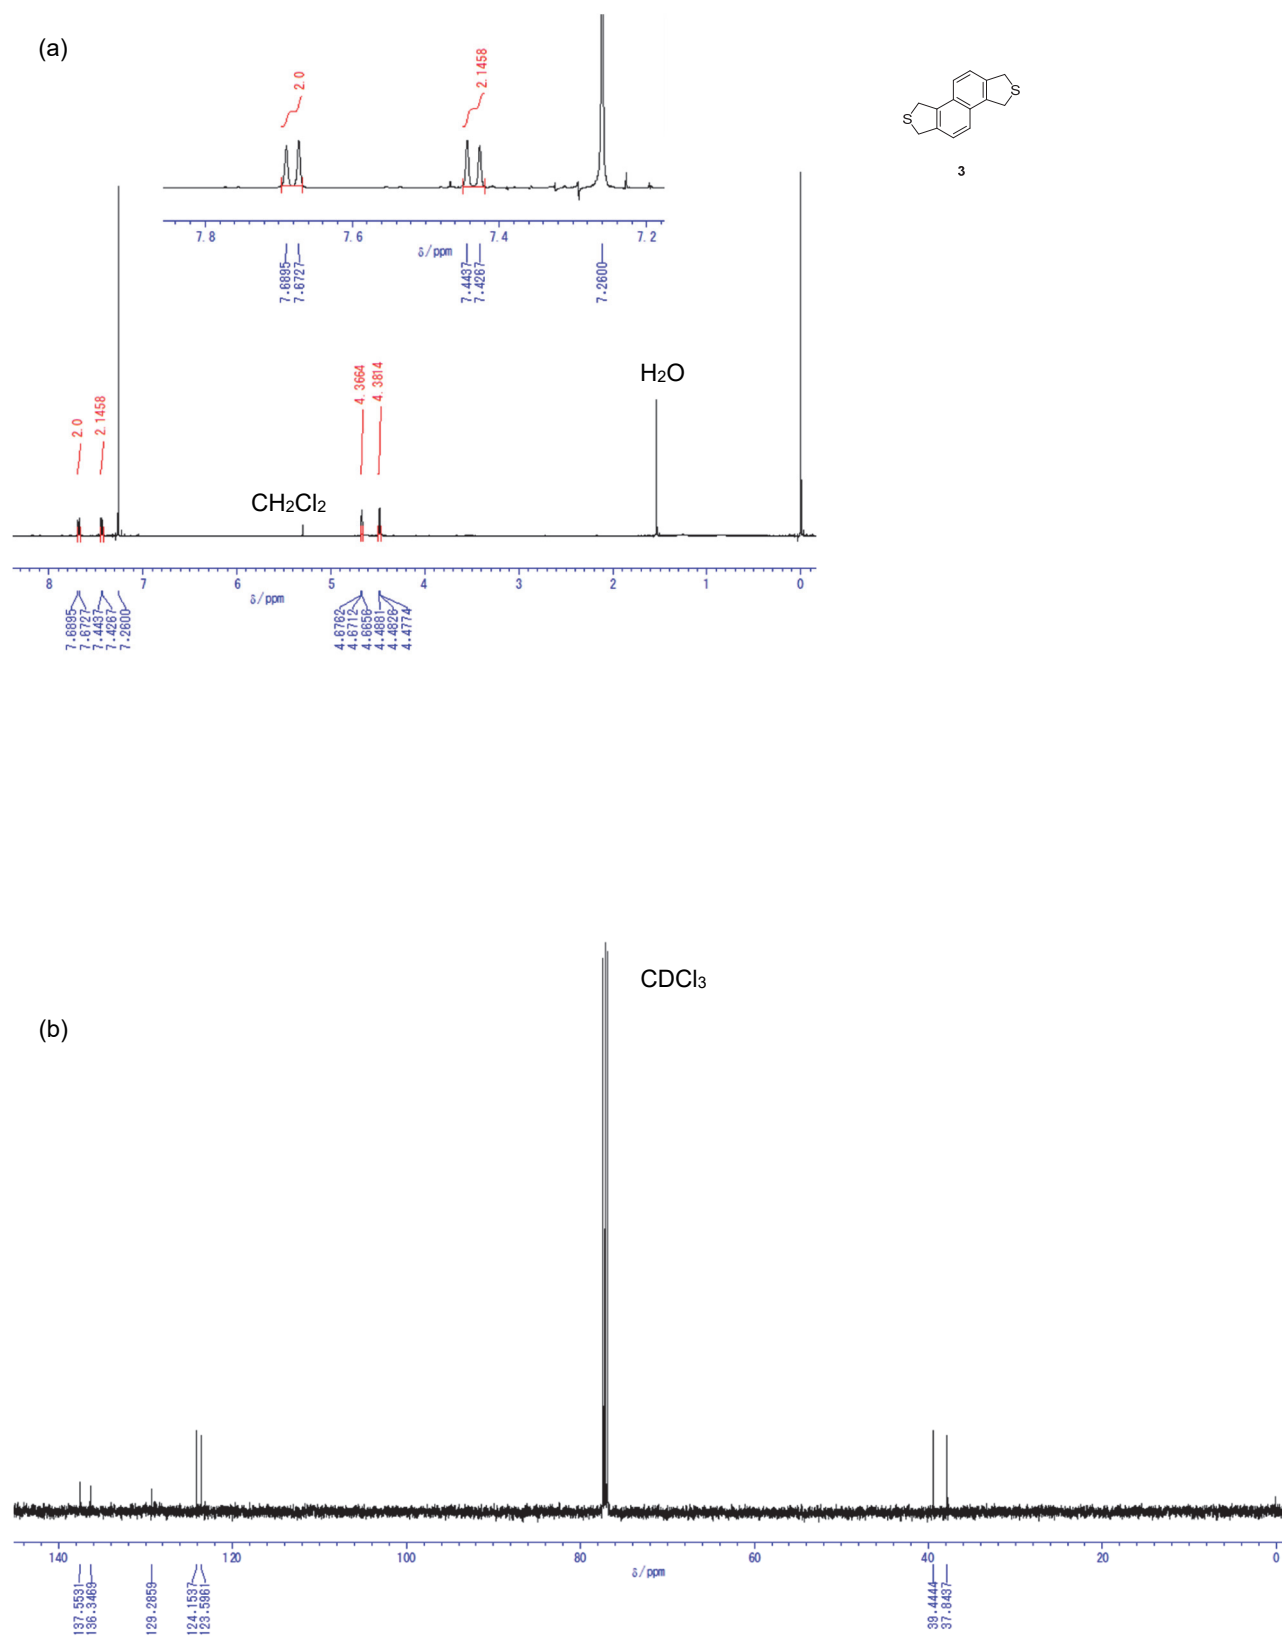

(a)

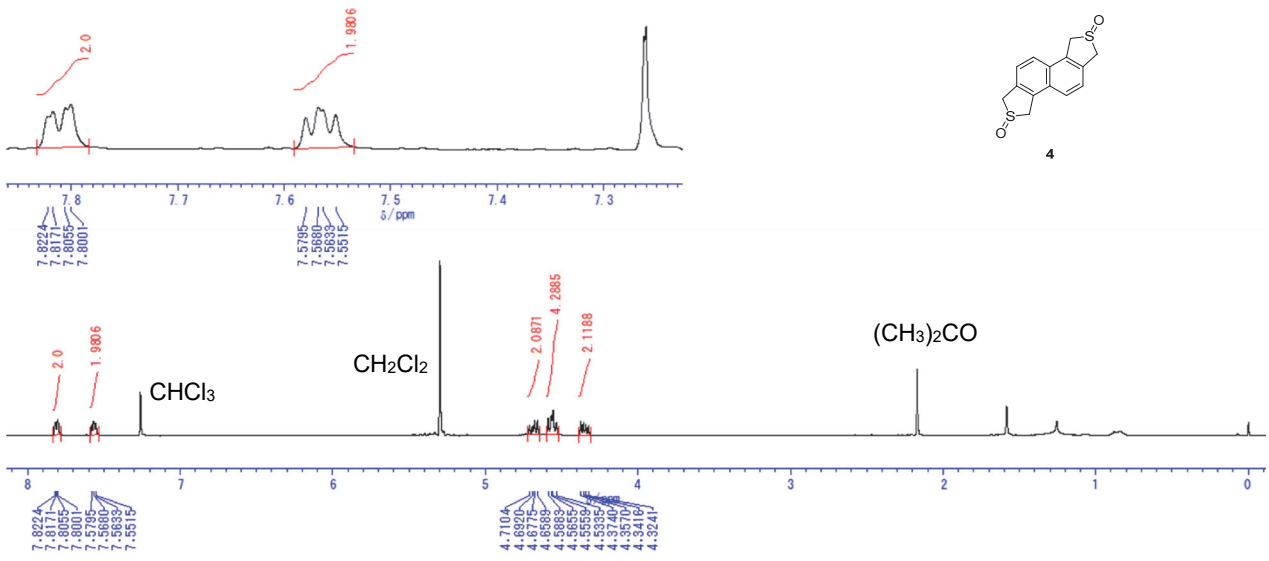

(b)

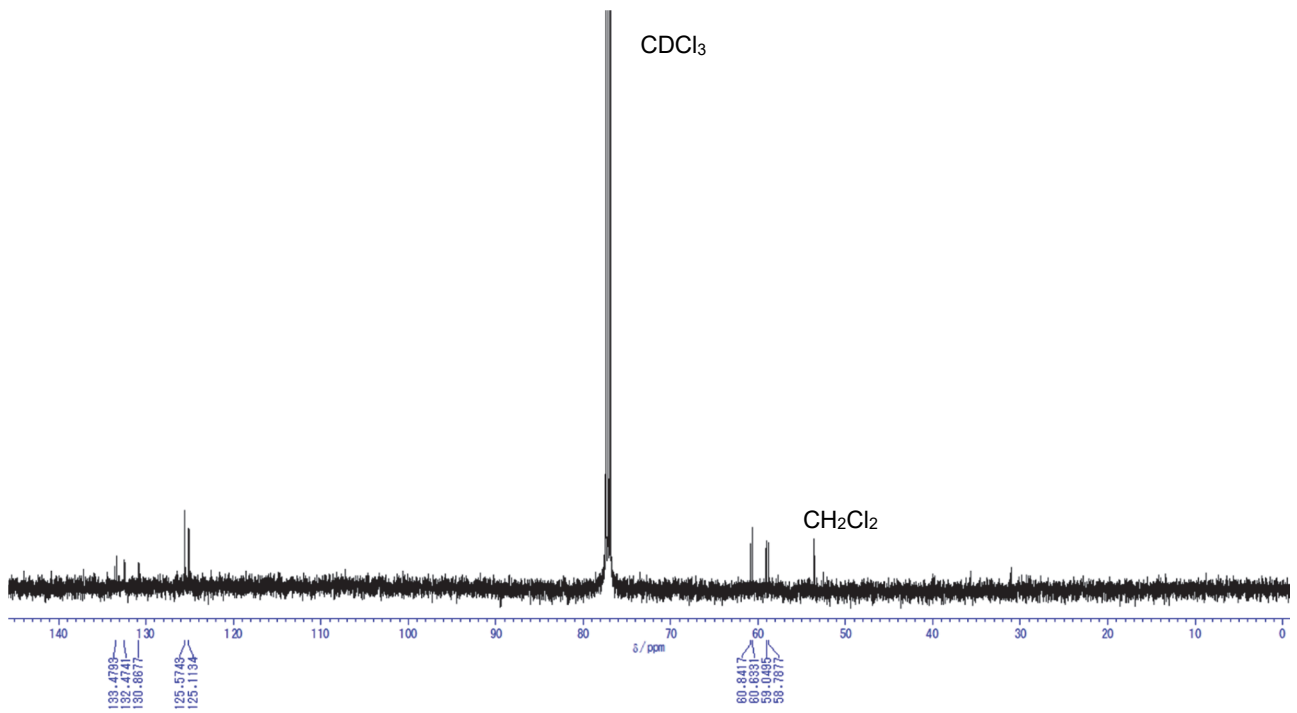

**Fig. S5** (a)  $^1\text{H NMR}$  (500 MHz) spectrum of **4** in  $\text{CDCl}_3$ . (b)  $^{13}\text{C NMR}$  (125 MHz) spectrum of **4** in  $\text{CDCl}_3$ .

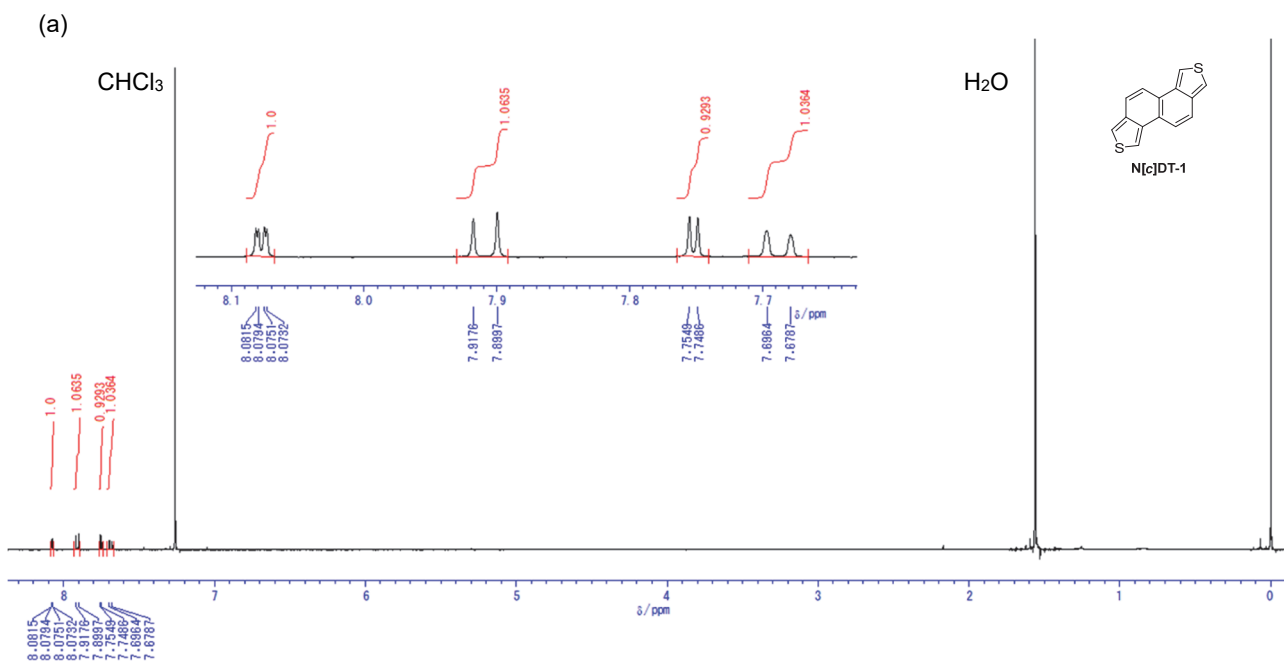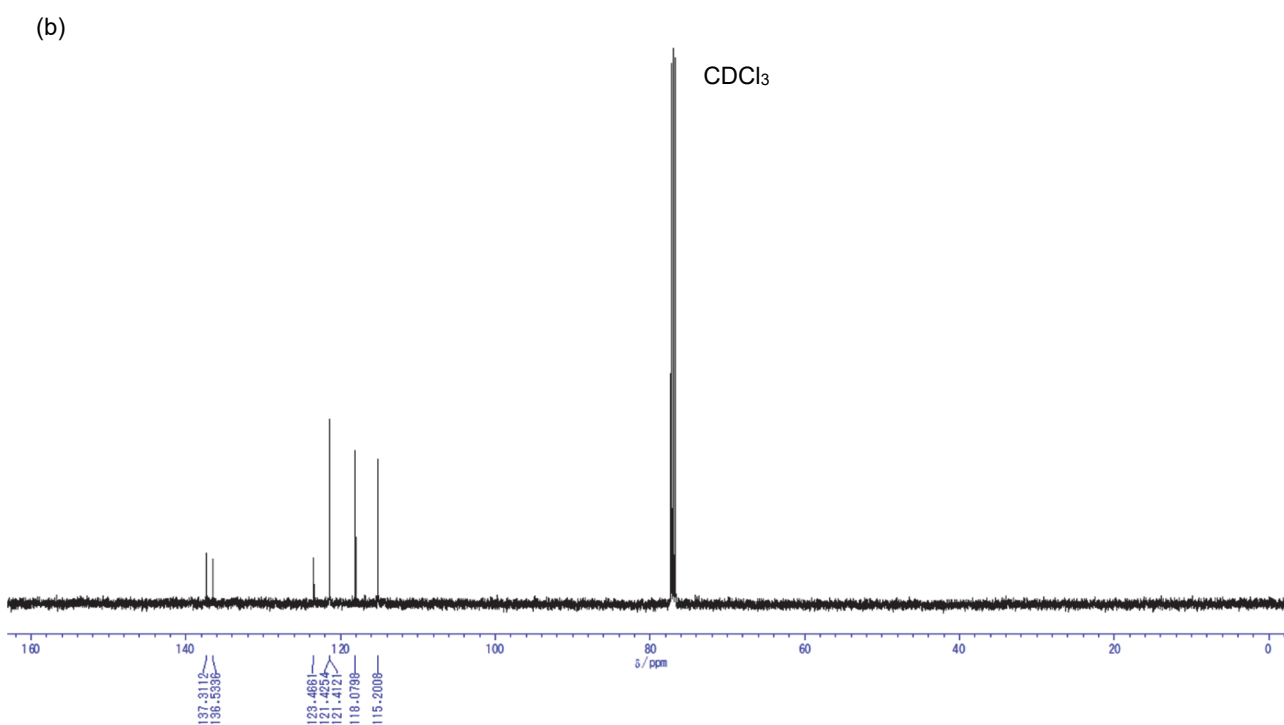

**Fig. S6** (a) <sup>1</sup>H NMR (500 MHz) spectrum of N[c]DT-1 in CDCl<sub>3</sub>. (b) <sup>13</sup>C NMR (125 MHz) spectrum of N[c]DT-1 in CDCl<sub>3</sub>.

(a)

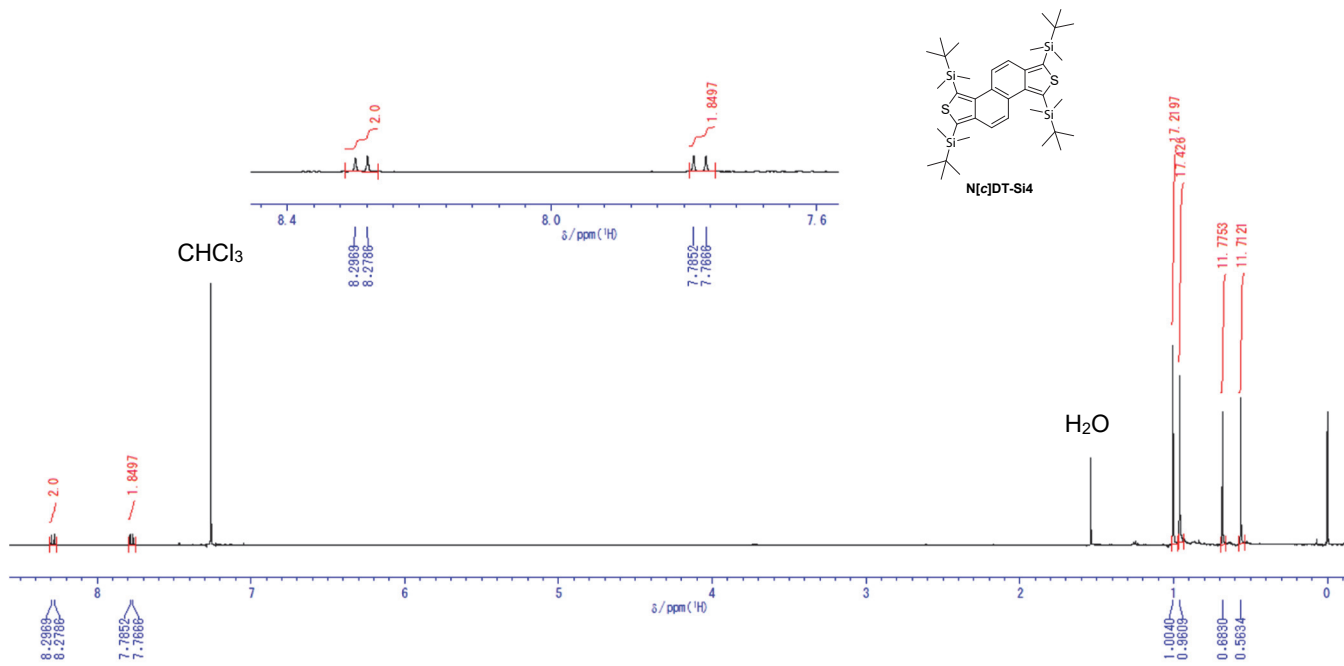

(b)

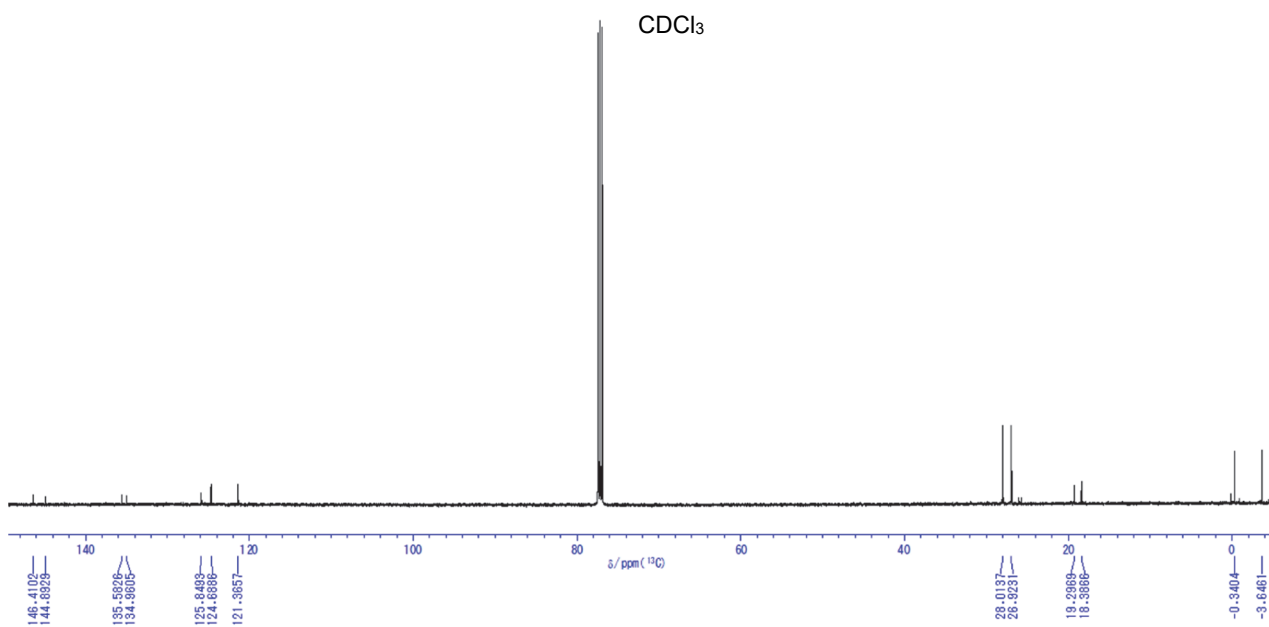

**Fig. S7** (a)  $^1\text{H}$  NMR (500 MHz) spectrum of **N[c]DT-Si4** in  $\text{CDCl}_3$ . (b)  $^{13}\text{C}$  NMR (125 MHz) spectrum of **N[c]DT-Si4** in  $\text{CDCl}_3$ .

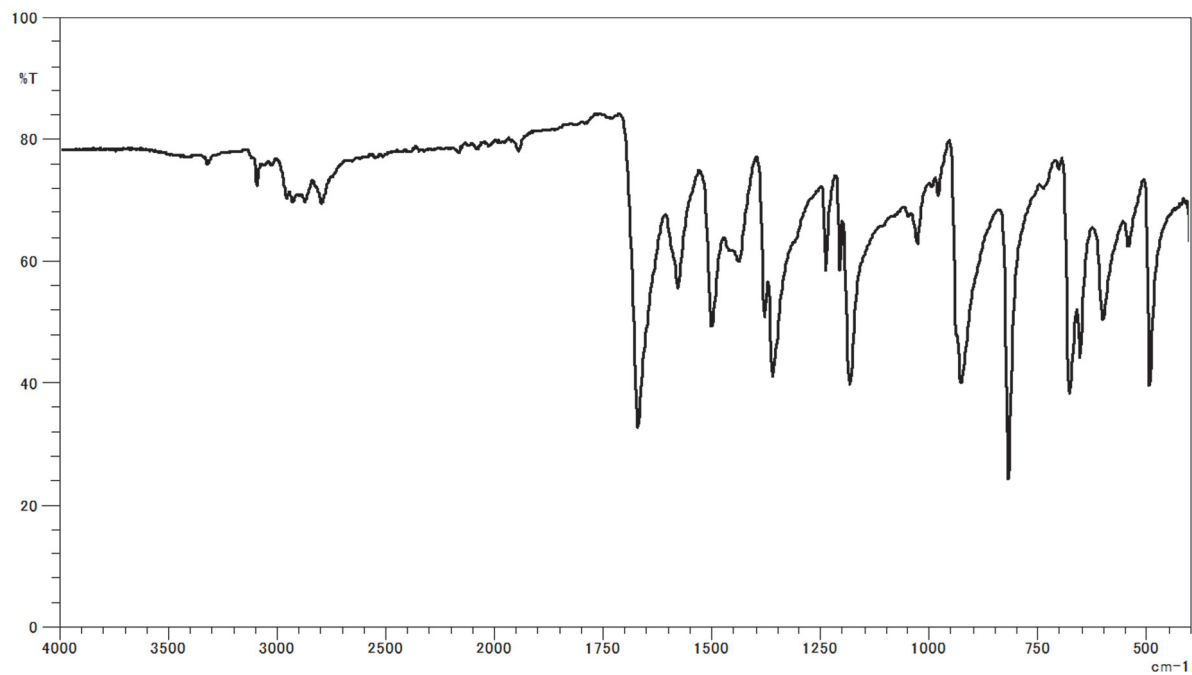

**Fig. S8** FTIR (ATR) spectrum of 2,6-dimethylnaphthalene-1,5-dicarbaldehyde.

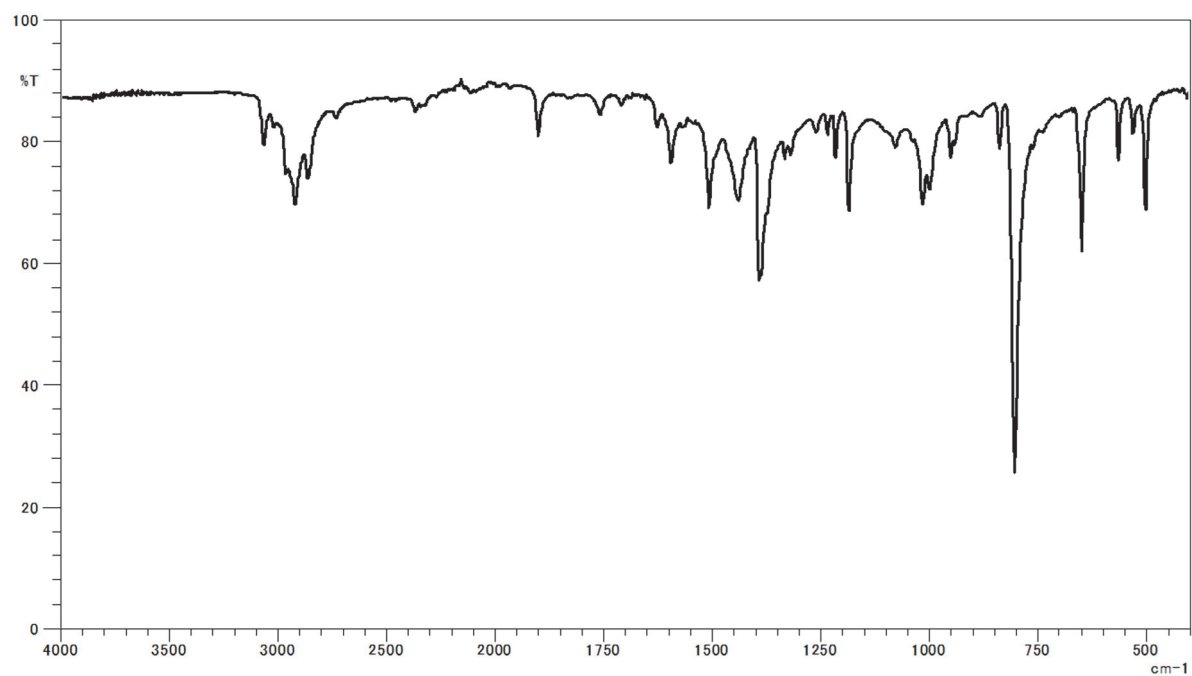

**Fig. S9** FTIR (ATR) spectrum of 1.

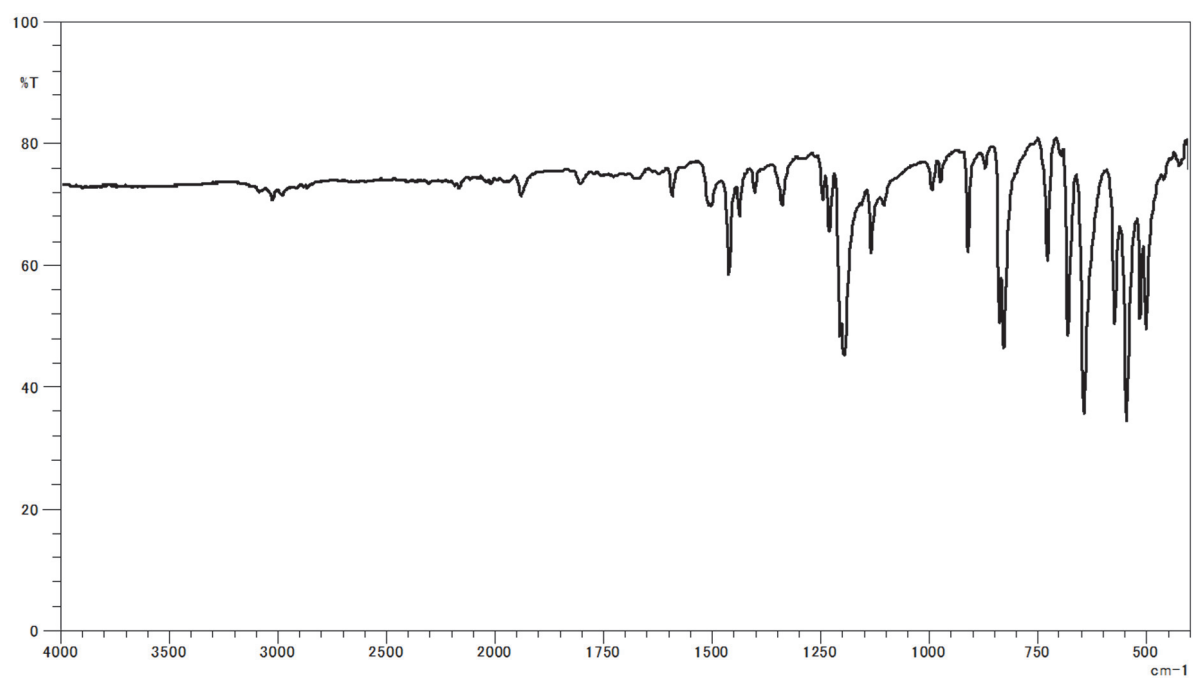

**Fig. S10** FTIR (ATR) spectrum of **2**.

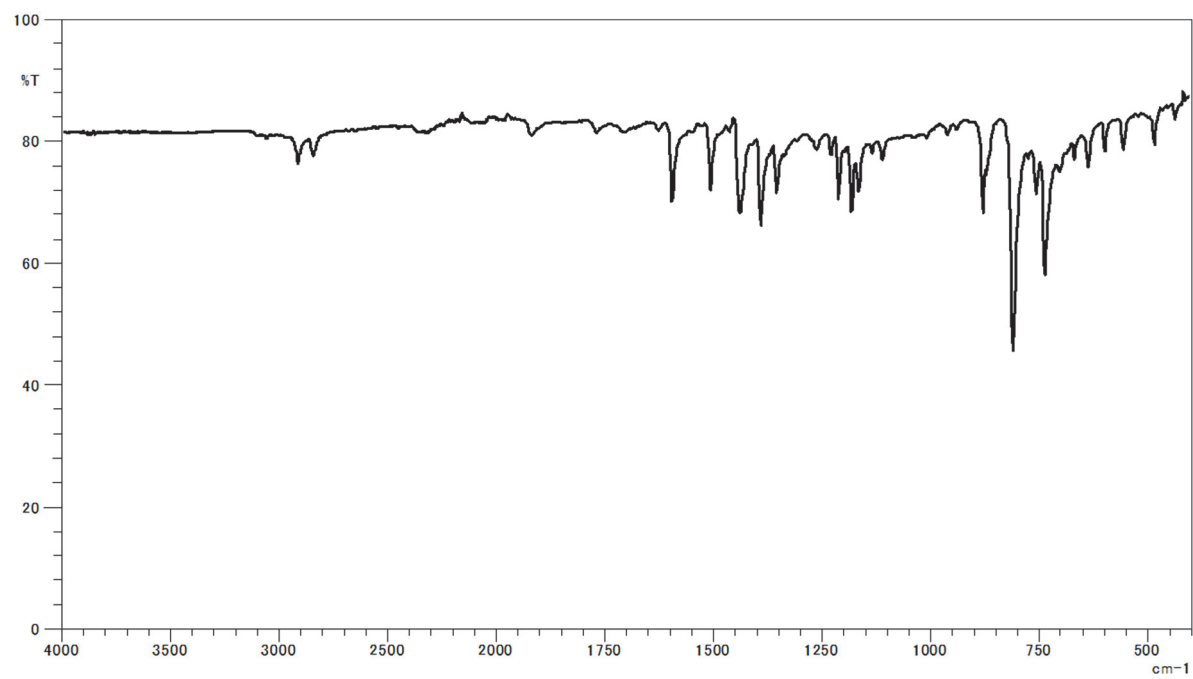

**Fig. S11** FTIR (ATR) spectrum of **3**.

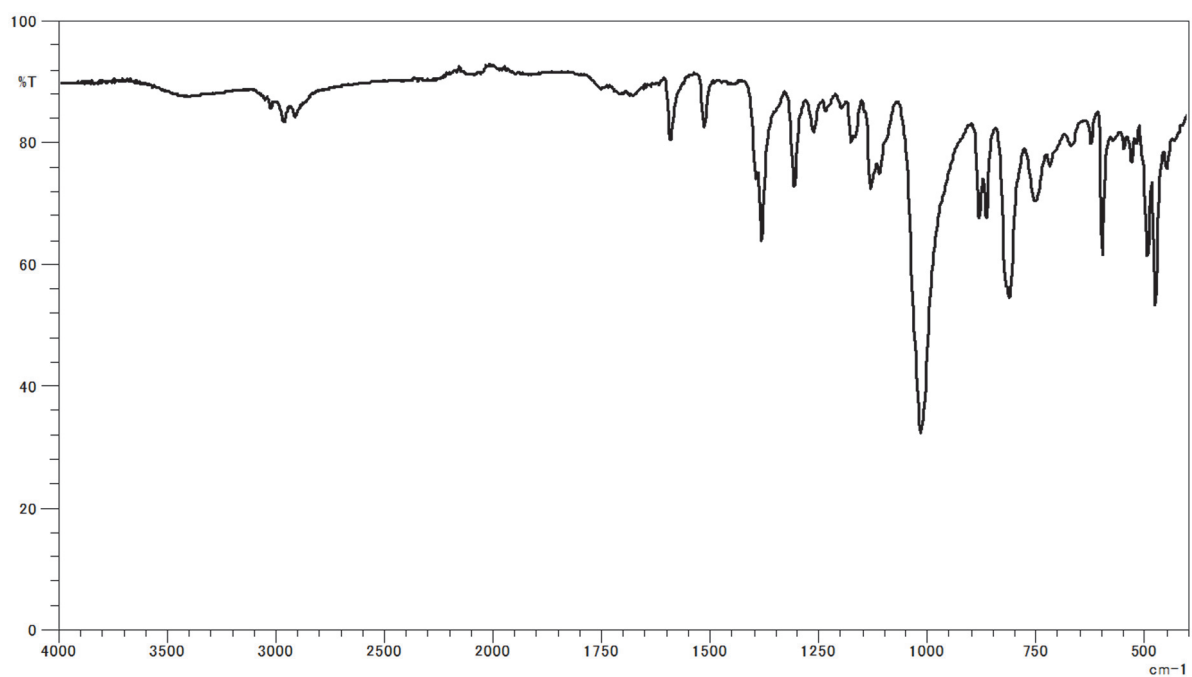

**Fig. S12** FTIR (ATR) spectrum of **4**.

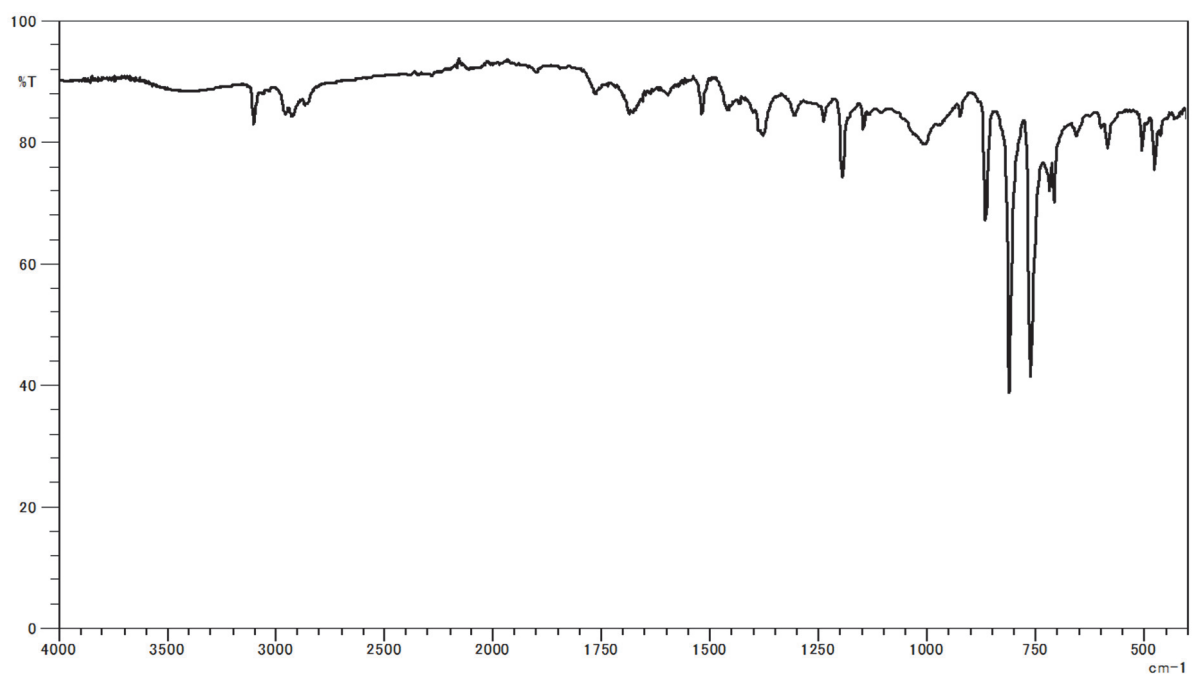

**Fig. S13** FTIR (ATR) spectrum of **N[c]DT-1**.

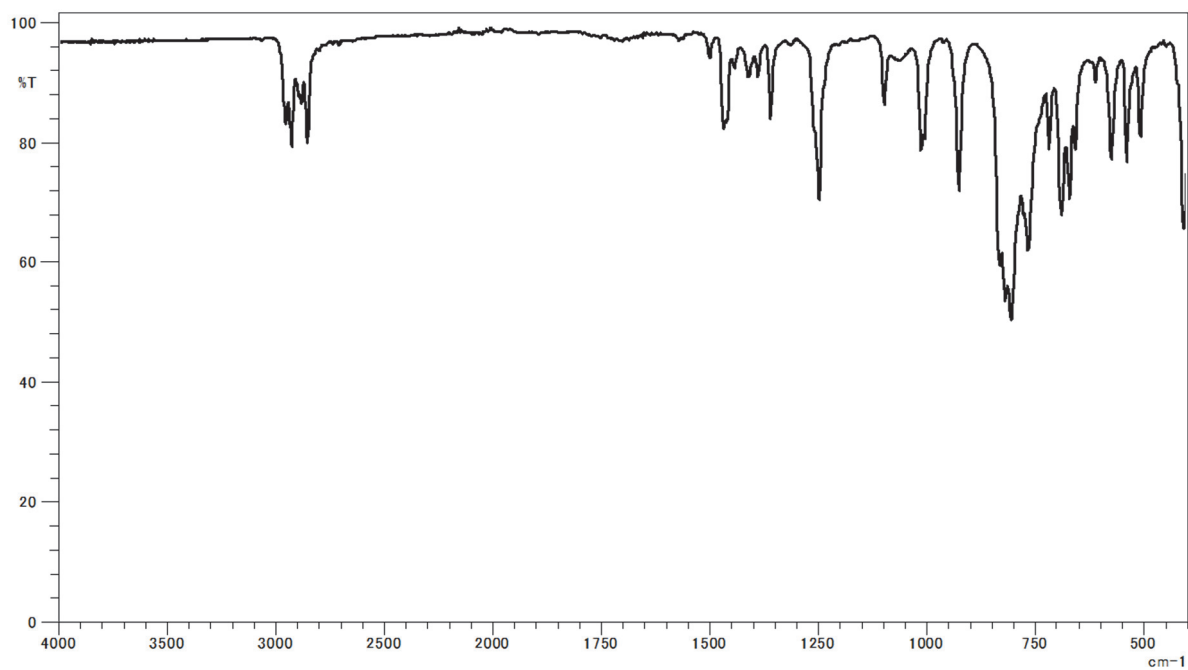

**Fig. S14** FTIR (ATR) spectrum of **N[c]DT-Si4**.

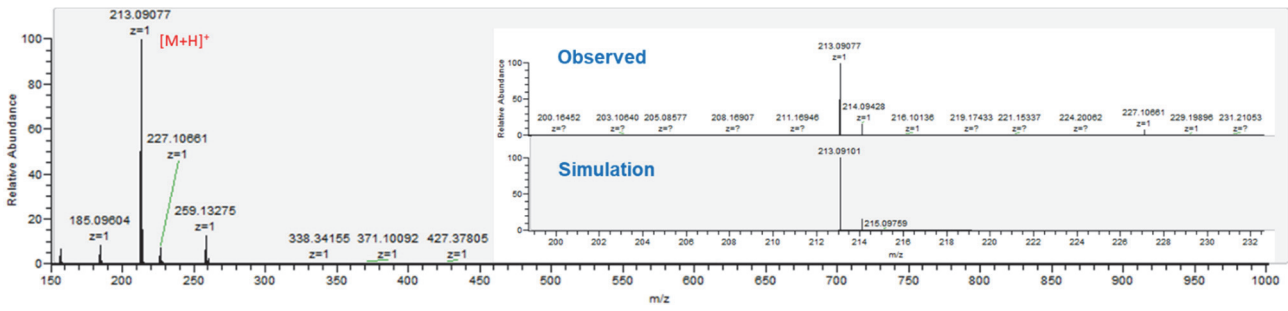

Fig. S15 HRMS spectrum of 2,6-dimethylnaphthalene-1,5-dicarbaldehyde.

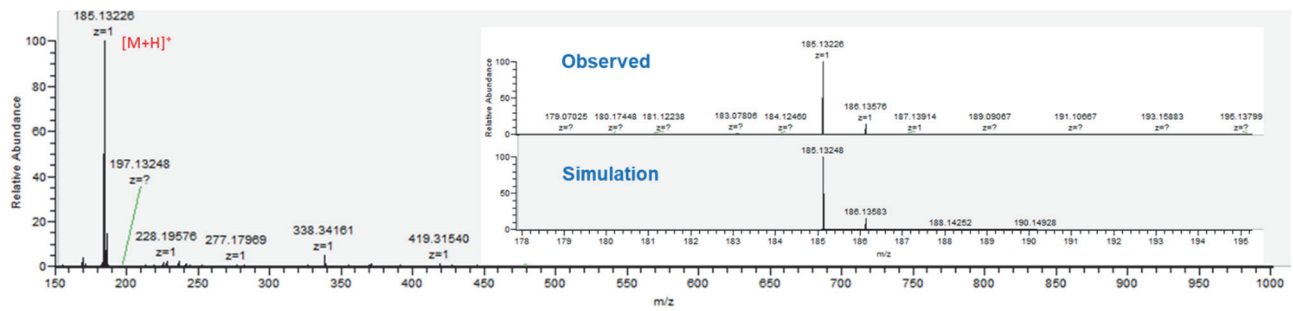

Fig. S16 HRMS spectrum of 1.

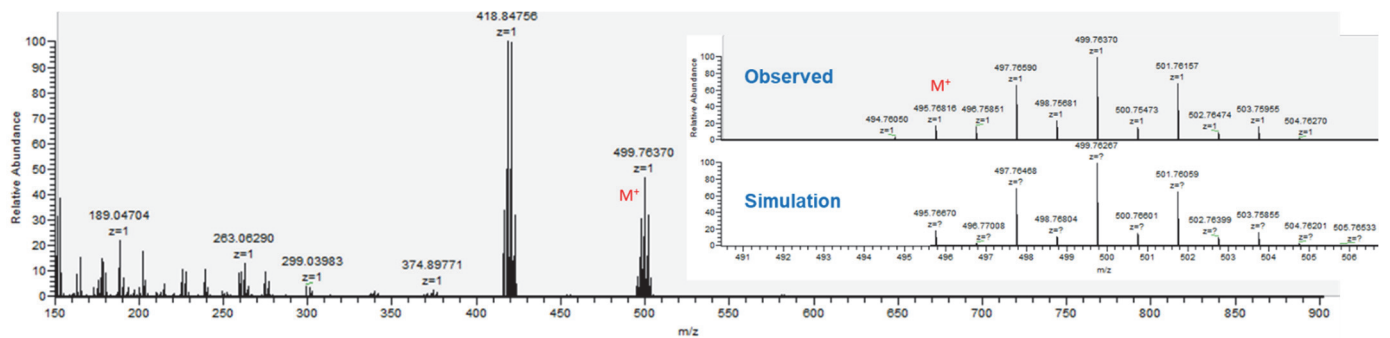

Fig. S17 HRMS spectrum of 2.

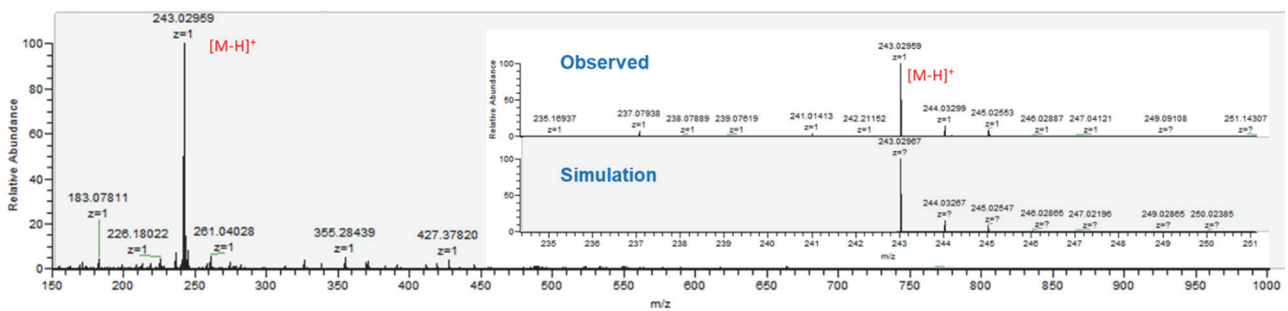

Fig. S18 HRMS spectrum of 3.

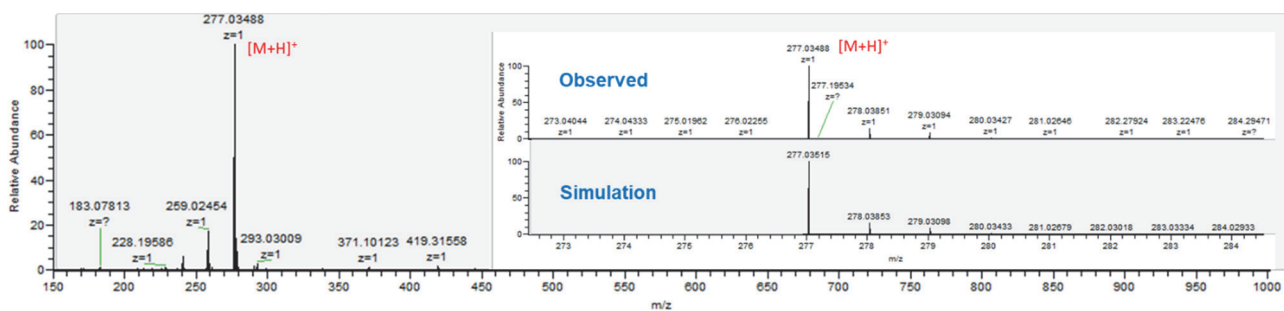

Fig. S19 HRMS spectrum of **4**.

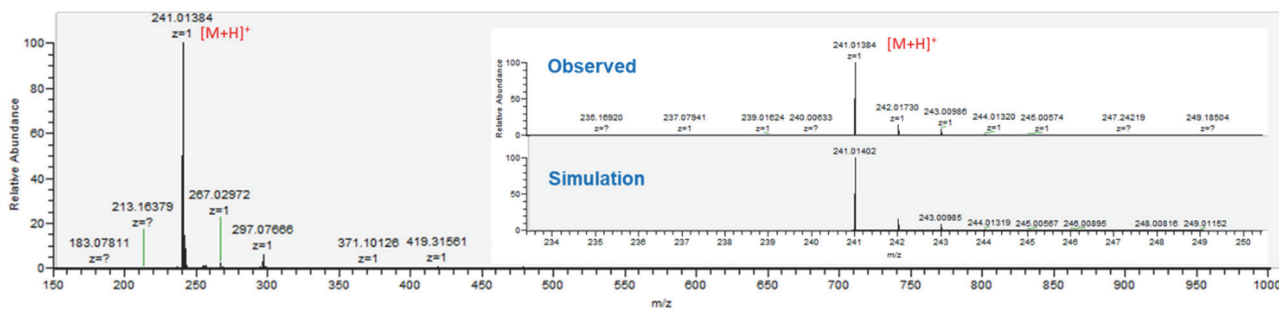

Fig. S20 HRMS spectrum of **N[c]DT-1**.

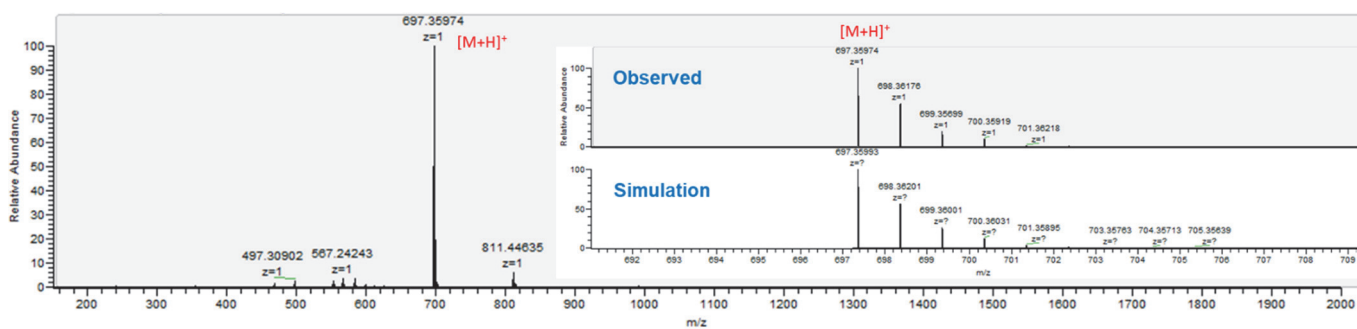

Fig. S21 HRMS spectrum of **N[c]DT-Si4**.

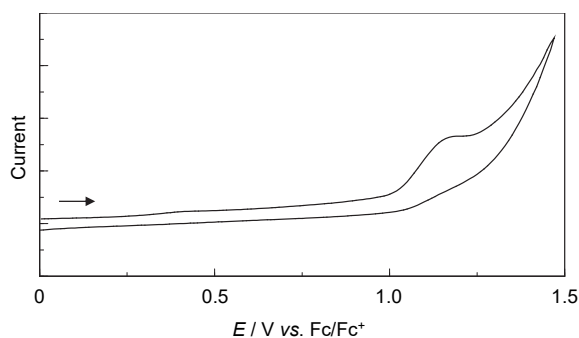

Fig. S22 Cyclic voltammogram of chrysenes in DMF containing 0.1 M  $\text{Bu}_4\text{NClO}_4$  at a scan rate of  $100 \text{ mV s}^{-1}$ . The arrow denotes the direction of the potential scan.

**Table S1** Geometrical coordinates of the optimized **N[c]DT-1** by DFT at the B3LYP/6-31G(d,p) level

Cartesian coordinates:

| Tag | Symbol | Coordinates(Angstroms) |            |            |
|-----|--------|------------------------|------------|------------|
|     |        | X                      | Y          | Z          |
| 1   | C      | 1.4658934              | -2.1247416 | 0.0002477  |
| 2   | C      | 2.3776918              | -1.0194724 | 0.0000802  |
| 3   | C      | 1.8563427              | 0.3353284  | -0.0000913 |
| 4   | C      | 0.4241013              | 0.5592761  | -0.0000109 |
| 5   | C      | -0.4241013             | -0.5592761 | 0.0000543  |
| 6   | C      | 0.1243744              | -1.8906112 | 0.0001582  |
| 7   | C      | -0.1243744             | 1.8906112  | -0.0000057 |
| 8   | C      | -1.4658934             | 2.1247416  | 0.0001118  |
| 9   | C      | -2.3776918             | 1.0194724  | 0.0000759  |
| 10  | C      | -1.8563427             | -0.3353284 | 0.0000061  |
| 11  | C      | -3.7597113             | 1.0555773  | 0.0000793  |
| 12  | S      | -4.4255776             | -0.5297351 | -0.0000003 |
| 13  | C      | -2.873061              | -1.2735684 | -0.0000197 |
| 14  | C      | 3.7597113              | -1.0555773 | 0.0000365  |
| 15  | S      | 4.4255776              | 0.5297351  | -0.0002092 |
| 16  | C      | 2.873061               | 1.2735684  | -0.0002379 |
| 17  | H      | 1.8531354              | -3.1391775 | 0.0003336  |
| 18  | H      | -0.5606691             | -2.7322219 | 0.0002709  |
| 19  | H      | 0.5606691              | 2.7322219  | 0.0000071  |
| 20  | H      | -1.8531354             | 3.1391775  | 0.0001213  |
| 21  | H      | 4.4048838              | -1.9224519 | 0.0001415  |
| 22  | H      | 2.8013599              | 2.3509554  | -0.0004351 |
| 23  | H      | -4.4048838             | 1.9224519  | 0.0001304  |
| 24  | H      | -2.80136               | -2.3509554 | -0.0001236 |

**Table S2** Geometrical coordinates of the optimized **N[c]DT-Si4** by DFT at the B3LYP/6-31G(d,p) level

Cartesian coordinates:

| Tag | Symbol | Coordinates(Angstroms) |            |            |
|-----|--------|------------------------|------------|------------|
|     |        | X                      | Y          | Z          |
| 1   | C      | 1.5356105              | 2.0324154  | -0.5131067 |
| 2   | C      | 2.4217365              | 0.9177807  | -0.3863522 |
| 3   | C      | 1.8652195              | -0.4138202 | -0.2039381 |
| 4   | C      | 0.4156144              | -0.5716385 | -0.2594587 |
| 5   | C      | -0.4156205             | 0.5716388  | -0.2594572 |
| 6   | C      | 0.188967               | 1.8609563  | -0.4154813 |
| 7   | C      | -0.1889728             | -1.8609544 | -0.415498  |
| 8   | C      | -1.5356162             | -2.0324134 | -0.5131299 |
| 9   | C      | -2.4217427             | -0.9177797 | -0.3863677 |
| 10  | C      | -1.8652256             | 0.4138201  | -0.2039476 |
| 11  | C      | -3.8213378             | -0.9730452 | -0.4011017 |
| 12  | S      | -4.4082898             | 0.6200111  | -0.1360187 |
| 13  | C      | -2.8612447             | 1.394764   | -0.0027983 |
| 14  | C      | 3.8213312              | 0.9730464  | -0.4010911 |
| 15  | S      | 4.4082846              | -0.6200106 | -0.1360147 |
| 16  | C      | 2.861239               | -1.3947642 | -0.0027896 |
| 17  | H      | 1.9375806              | 3.0239737  | -0.6862859 |
| 18  | H      | -0.4507167             | 2.7214501  | -0.5294414 |
| 19  | H      | 0.450712               | -2.7214471 | -0.5294594 |
| 20  | H      | -1.9375854             | -3.0239706 | -0.6863191 |
| 21  | Si     | -4.9283972             | -2.4968325 | -0.6421566 |
| 22  | Si     | -2.8701964             | 3.2406585  | 0.5035113  |
| 23  | Si     | 4.9283902              | 2.496833   | -0.6421529 |
| 24  | Si     | 2.8702135              | -3.2406768 | 0.5034563  |
| 25  | C      | 4.5879684              | -3.8471625 | 1.1893999  |
| 26  | C      | 1.6119537              | -3.5141934 | 1.8991703  |
| 27  | H      | 0.6596114              | -3.0110683 | 1.7248675  |
| 28  | H      | 1.4066025              | -4.5824018 | 2.0272321  |
| 29  | H      | 2.0118938              | -3.1386299 | 2.846708   |
| 30  | C      | 2.4877945              | -4.3189213 | -1.0171697 |
| 31  | H      | 2.4806643              | -5.3811495 | -0.7502505 |
| 32  | H      | 1.5268053              | -4.093975  | -1.4866099 |
| 33  | H      | 3.2568071              | -4.173504  | -1.78288   |
| 34  | C      | -4.5488305             | -3.7218298 | 0.7561573  |
| 35  | H      | -5.0928457             | -4.6625877 | 0.6198706  |
| 36  | H      | -3.4818834             | -3.9598712 | 0.7997715  |
| 37  | H      | -4.8279207             | -3.3097102 | 1.7310451  |
| 38  | C      | -6.8137534             | -2.0736235 | -0.625     |
| 39  | C      | -4.58798               | 3.847184   | 1.1893411  |
| 40  | C      | -1.6120245             | 3.5140324  | 1.8993287  |
| 41  | H      | -0.6596157             | 3.0110617  | 1.7249402  |
| 42  | H      | -1.4068065             | 4.5822373  | 2.0276308  |
| 43  | H      | -2.0119457             | 3.1382083  | 2.8467708  |
| 44  | C      | 4.5488392              | 3.7218287  | 0.7561665  |
| 45  | H      | 5.0928552              | 4.6625855  | 0.619876   |
| 46  | H      | 3.4818932              | 3.9598725  | 0.7997913  |
| 47  | H      | 4.827938               | 3.309707   | 1.731051   |
| 48  | C      | 6.8137459              | 2.0736212  | -0.6250154 |
| 49  | C      | 4.4844068              | 3.2836214  | -2.3108092 |
| 50  | H      | 3.4140907              | 3.4982909  | -2.3820608 |

|     |   |            |            |            |
|-----|---|------------|------------|------------|
| 51  | H | 5.0214263  | 4.2262171  | -2.4611344 |
| 52  | H | 4.7355153  | 2.617258   | -3.1421697 |
| 53  | C | -2.4876032 | 4.3189899  | -1.0170192 |
| 54  | H | -2.4802018 | 5.381186   | -0.7499783 |
| 55  | H | -1.5266907 | 4.0938652  | -1.4865307 |
| 56  | H | -3.2566882 | 4.173856   | -1.7827096 |
| 57  | C | -4.4844289 | -3.2836189 | -2.310818  |
| 58  | H | -4.7355457 | -2.6172552 | -3.1421758 |
| 59  | H | -3.4141131 | -3.4982874 | -2.3820796 |
| 60  | H | -5.0214489 | -4.2262151 | -2.4611387 |
| 61  | C | 7.5974633  | 3.3886288  | -0.8519076 |
| 62  | H | 8.6769018  | 3.1857965  | -0.844292  |
| 63  | H | 7.3624826  | 3.8503973  | -1.8168211 |
| 64  | H | 7.402571   | 4.128396   | -0.0679845 |
| 65  | C | 7.2535158  | 1.482721   | 0.7323555  |
| 66  | H | 6.7626682  | 0.530387   | 0.9539526  |
| 67  | H | 8.33656    | 1.2981953  | 0.7299093  |
| 68  | H | 7.0435337  | 2.165837   | 1.5624932  |
| 69  | C | 7.1870935  | 1.0919629  | -1.757253  |
| 70  | H | 8.2704733  | 0.9093807  | -1.7559208 |
| 71  | H | 6.6938889  | 0.1212722  | -1.6501085 |
| 72  | H | 6.9271858  | 1.4890854  | -2.7445253 |
| 73  | C | 5.6900771  | -3.8838291 | 0.1072414  |
| 74  | H | 5.9327304  | -2.892939  | -0.2858094 |
| 75  | H | 6.6150176  | -4.2991527 | 0.5304966  |
| 76  | H | 5.4098609  | -4.5188376 | -0.7397484 |
| 77  | C | 4.382213   | -5.2997987 | 1.6901123  |
| 78  | H | 5.3336834  | -5.6957147 | 2.0697968  |
| 79  | H | 3.6581643  | -5.3594253 | 2.5085636  |
| 80  | H | 4.0490462  | -5.9746001 | 0.894417   |
| 81  | C | 5.0764146  | -3.0081269 | 2.3905796  |
| 82  | H | 5.9964179  | -3.4452763 | 2.8024017  |
| 83  | H | 5.3000343  | -1.9739537 | 2.1170832  |
| 84  | H | 4.340048   | -2.9853058 | 3.2011982  |
| 85  | C | -5.0765044 | 3.008204   | 2.3905276  |
| 86  | H | -5.9965367 | 3.4453692  | 2.8022683  |
| 87  | H | -5.3001032 | 1.9740171  | 2.1170642  |
| 88  | H | -4.3401912 | 2.9854245  | 3.2011954  |
| 89  | C | -5.6900319 | 3.8838231  | 0.1071236  |
| 90  | H | -5.9327056 | 2.8929161  | -0.2858705 |
| 91  | H | -6.614976  | 4.2992138  | 0.530305   |
| 92  | H | -5.4097517 | 4.5187611  | -0.7398982 |
| 93  | C | -4.3822239 | 5.2998375  | 1.6900026  |
| 94  | H | -5.33371   | 5.6957957  | 2.0696032  |
| 95  | H | -3.6582303 | 5.3594814  | 2.5085016  |
| 96  | H | -4.0489816 | 5.9745927  | 0.8942999  |
| 97  | C | -7.1871136 | -1.0919636 | -1.757232  |
| 98  | H | -8.2704938 | -0.9093838 | -1.7558894 |
| 99  | H | -6.6939102 | -0.121272  | -1.65009   |
| 100 | H | -6.9272141 | -1.4890833 | -2.7445076 |
| 101 | C | -7.2535109 | -1.4827265 | 0.7323762  |
| 102 | H | -6.7626615 | -0.5303929 | 0.9539706  |
| 103 | H | -8.3365552 | -1.2982012 | 0.7299404  |
| 104 | H | -7.043521  | -2.1658442 | 1.5625106  |

|     |   |            |            |            |
|-----|---|------------|------------|------------|
| 105 | C | -7.5974707 | -3.3886321 | -0.8518874 |
| 106 | H | -7.4025691 | -4.1284008 | -0.0679679 |
| 107 | H | -8.6769096 | -3.1858018 | -0.8442604 |
| 108 | H | -7.3624989 | -3.8503978 | -1.8168044 |

**Table S3** Geometrical coordinates of the optimized **4,4'-BBT** by DFT at the B3LYP/6-31G(d,p) level

Cartesian coordinates:

| Tag | Symbol | Coordinates(Angstroms) |           |           |
|-----|--------|------------------------|-----------|-----------|
|     |        | X                      | Y         | Z         |
| 1   | C      | 3.014613               | 0.092656  | 0.246587  |
| 2   | C      | 3.469568               | 1.192933  | 1.038642  |
| 3   | C      | 2.586725               | 2.181467  | 1.372708  |
| 4   | C      | 1.21901                | 2.12832   | 0.956653  |
| 5   | C      | 0.713504               | 1.089175  | 0.210163  |
| 6   | C      | 1.622641               | 0.033794  | -0.17567  |
| 7   | S      | 2.781034               | -2.035549 | -1.172737 |
| 8   | C      | -1.622642              | 0.033794  | 0.17567   |
| 9   | C      | -0.713504              | 1.089175  | -0.210163 |
| 10  | C      | -1.21901               | 2.128319  | -0.956655 |
| 11  | C      | -2.586726              | 2.181466  | -1.372709 |
| 12  | C      | -3.469569              | 1.192933  | -1.038641 |
| 13  | C      | -3.014613              | 0.092656  | -0.246585 |
| 14  | S      | -2.781033              | -2.035551 | 1.172734  |
| 15  | H      | 4.506637               | 1.23322   | 1.358132  |
| 16  | H      | 2.916292               | 3.02579   | 1.971013  |
| 17  | H      | 0.549238               | 2.927872  | 1.258602  |
| 18  | H      | -0.549238              | 2.927871  | -1.258604 |
| 19  | H      | -2.916292              | 3.025789  | -1.971014 |
| 20  | H      | -4.506638              | 1.23322   | -1.35813  |
| 21  | C      | 3.751548               | -0.981598 | -0.225472 |
| 22  | H      | 4.800145               | -1.191301 | -0.070182 |
| 23  | C      | 1.369808               | -1.078593 | -0.963293 |
| 24  | H      | 0.437756               | -1.375725 | -1.419233 |
| 25  | C      | -1.369809              | -1.078591 | 0.963295  |
| 26  | H      | -0.437757              | -1.375723 | 1.419236  |
| 27  | C      | -3.751549              | -0.981596 | 0.225475  |
| 28  | H      | -4.800146              | -1.191299 | 0.070187  |

**Table S4** Geometrical coordinates of the optimized **4,4'-BBT-Si4** by DFT at the B3LYP/6-31G(d,p) level

Cartesian coordinates:

| Tag | Symbol | Coordinates(Angstroms) |           |           |
|-----|--------|------------------------|-----------|-----------|
|     |        | X                      | Y         | Z         |
| 1   | C      | 4.218161               | -0.33767  | -0.016252 |
| 2   | C      | 3.066512               | -0.77509  | 0.653943  |
| 3   | C      | 3.009221               | -1.909125 | 1.51953   |
| 4   | H      | 3.910183               | -2.480712 | 1.707261  |
| 5   | C      | 1.826697               | -2.26251  | 2.105088  |
| 6   | H      | 1.773574               | -3.118151 | 2.771738  |
| 7   | C      | 0.656908               | -1.493972 | 1.862646  |
| 8   | H      | -0.261931              | -1.769139 | 2.369861  |
| 9   | C      | 0.637633               | -0.390744 | 1.036687  |
| 10  | C      | 1.866232               | 0.024955  | 0.386908  |
| 11  | C      | 2.114446               | 1.088983  | -0.514497 |
| 12  | C      | 6.809855               | -0.307254 | -1.620217 |
| 13  | H      | 6.802518               | 0.785533  | -1.678026 |
| 14  | H      | 7.853335               | -0.633829 | -1.684102 |
| 15  | H      | 6.290831               | -0.688549 | -2.505699 |
| 16  | C      | 6.041037               | -2.86158  | -0.122845 |
| 17  | H      | 5.34186                | -3.226144 | -0.882163 |
| 18  | H      | 7.04384                | -3.200161 | -0.405932 |
| 19  | H      | 5.787633               | -3.348789 | 0.823057  |
| 20  | C      | 6.970751               | -0.33548  | 1.509924  |
| 21  | C      | 8.420041               | -0.867745 | 1.459713  |
| 22  | H      | 8.985098               | -0.512927 | 2.332474  |
| 23  | H      | 8.457503               | -1.962788 | 1.473604  |
| 24  | H      | 8.955707               | -0.525105 | 0.56745   |
| 25  | C      | 6.303838               | -0.827547 | 2.811122  |
| 26  | H      | 5.273994               | -0.468341 | 2.904417  |
| 27  | H      | 6.285945               | -1.921581 | 2.876675  |
| 28  | H      | 6.860867               | -0.462198 | 3.684818  |
| 29  | C      | 7.001599               | 1.207344  | 1.520032  |
| 30  | H      | 7.549511               | 1.571454  | 2.399883  |
| 31  | H      | 7.502412               | 1.61494   | 0.63493   |
| 32  | H      | 5.993996               | 1.634556  | 1.560787  |
| 33  | C      | 1.916458               | 2.515077  | -3.191008 |
| 34  | H      | 1.474095               | 3.334924  | -3.768268 |
| 35  | H      | 3.003072               | 2.617719  | -3.251161 |
| 36  | H      | 1.646205               | 1.579186  | -3.691998 |
| 37  | C      | -0.639894              | 2.357931  | -1.619016 |
| 38  | H      | -0.921469              | 1.343743  | -1.912766 |
| 39  | H      | -1.205427              | 2.61625   | -0.722451 |
| 40  | H      | -0.95275               | 3.034042  | -2.422946 |
| 41  | C      | 1.658739               | 4.242796  | -0.610874 |
| 42  | C      | 3.144123               | 4.60451   | -0.82185  |
| 43  | H      | 3.816352               | 3.883698  | -0.345652 |
| 44  | H      | 3.410277               | 4.660591  | -1.882733 |
| 45  | H      | 3.356494               | 5.588106  | -0.380499 |
| 46  | C      | 1.363225               | 4.252281  | 0.901551  |
| 47  | H      | 1.603609               | 5.235979  | 1.328893  |
| 48  | H      | 0.308586               | 4.051797  | 1.113043  |
| 49  | H      | 1.961625               | 3.50643   | 1.435645  |
| 50  | C      | 0.792869               | 5.329558  | -1.289518 |

|     |   |           |           |           |
|-----|---|-----------|-----------|-----------|
| 51  | H | 1.03961   | 6.318106  | -0.878443 |
| 52  | H | 0.962508  | 5.379704  | -2.371199 |
| 53  | H | -0.277122 | 5.166474  | -1.124974 |
| 54  | C | -4.218199 | 0.337696  | -0.01623  |
| 55  | C | -3.066543 | 0.775158  | 0.653922  |
| 56  | C | -3.009278 | 1.90918   | 1.519525  |
| 57  | H | -3.910269 | 2.4807    | 1.70732   |
| 58  | C | -1.826754 | 2.262597  | 2.105064  |
| 59  | H | -1.773638 | 3.118237  | 2.771718  |
| 60  | C | -0.656959 | 1.49407   | 1.862627  |
| 61  | H | 0.261867  | 1.769224  | 2.369871  |
| 62  | C | -0.63765  | 0.390855  | 1.036651  |
| 63  | C | -1.866239 | -0.024847 | 0.386848  |
| 64  | C | -2.11446  | -1.088901 | -0.51452  |
| 65  | C | -6.809806 | 0.307577  | -1.620348 |
| 66  | H | -6.802379 | -0.785193 | -1.678443 |
| 67  | H | -7.853311 | 0.634084  | -1.684188 |
| 68  | H | -6.290778 | 0.689149  | -2.505709 |
| 69  | C | -6.041244 | 2.861592  | -0.122269 |
| 70  | H | -5.34176  | 3.226545  | -0.881112 |
| 71  | H | -7.043971 | 3.200087  | -0.405734 |
| 72  | H | -5.788418 | 3.348522  | 0.823933  |
| 73  | C | -6.970791 | 0.335081  | 1.509822  |
| 74  | C | -6.303554 | 0.826421  | 2.811127  |
| 75  | H | -5.273783 | 0.466915  | 2.904103  |
| 76  | H | -6.28536  | 1.920421  | 2.877146  |
| 77  | H | -6.860539 | 0.460843  | 3.684755  |
| 78  | C | -8.419941 | 0.867762  | 1.460035  |
| 79  | H | -8.45709  | 1.962805  | 1.474463  |
| 80  | H | -8.955802 | 0.525708  | 0.567662  |
| 81  | H | -8.985003 | 0.51267   | 2.332681  |
| 82  | C | -7.002046 | -1.207739 | 1.519275  |
| 83  | H | -7.549808 | -1.572088 | 2.39912   |
| 84  | H | -7.503215 | -1.614811 | 0.634134  |
| 85  | H | -5.994546 | -1.635247 | 1.559566  |
| 86  | C | -1.91645  | -2.51493  | -3.191073 |
| 87  | H | -1.47409  | -3.334782 | -3.768334 |
| 88  | H | -3.003066 | -2.617585 | -3.251208 |
| 89  | H | -1.646206 | -1.579043 | -3.692072 |
| 90  | C | 0.639921  | -2.357663 | -1.619065 |
| 91  | H | 0.921517  | -1.343309 | -1.912209 |
| 92  | H | 1.205474  | -2.616495 | -0.722658 |
| 93  | H | 0.952745  | -3.033314 | -2.423393 |
| 94  | C | -1.658631 | -4.242688 | -0.611001 |
| 95  | C | -1.363302 | -4.2521   | 0.901461  |
| 96  | H | -0.308742 | -4.051353 | 1.1131    |
| 97  | H | -1.961957 | -3.506391 | 1.435461  |
| 98  | H | -1.603502 | -5.235853 | 1.328779  |
| 99  | C | -0.79254  | -5.329345 | -1.289527 |
| 100 | H | -1.039207 | -6.317926 | -0.878487 |
| 101 | H | -0.962019 | -5.379518 | -2.371234 |
| 102 | H | 0.277411  | -5.166123 | -1.124846 |
| 103 | C | -3.143944 | -4.60458  | -0.822158 |
| 104 | H | -3.816323 | -3.883816 | -0.346099 |

|     |    |           |           |           |
|-----|----|-----------|-----------|-----------|
| 105 | H  | -3.409941 | -4.660748 | -1.883076 |
| 106 | H  | -3.356256 | -5.588174 | -0.380777 |
| 107 | S  | 3.790812  | 1.023678  | -0.967463 |
| 108 | S  | -3.79085  | -1.0237   | -0.967374 |
| 109 | Si | 6.003406  | -0.96692  | -0.03706  |
| 110 | Si | 1.228135  | 2.52939   | -1.417205 |
| 111 | Si | -1.228105 | -2.529245 | -1.417284 |
| 112 | Si | -6.003452 | 0.966909  | -0.037005 |

**Table S5** Geometrical coordinates of the optimized **N[b]DT-3** by DFT at the B3LYP/6-31G(d,p) level

Cartesian coordinates:

| Tag | Symbol | Coordinates(Angstroms) |            |            |
|-----|--------|------------------------|------------|------------|
|     |        | X                      | Y          | Z          |
| 1   | C      | 1.3493332              | -2.1768314 | 0.0003766  |
| 2   | C      | 2.3018626              | -1.122762  | 0.0001937  |
| 3   | C      | 1.8476048              | 0.2062904  | 0.0000859  |
| 4   | C      | 0.4658727              | 0.5441183  | 0.0000778  |
| 5   | C      | -0.4658727             | -0.5441183 | 0.0001447  |
| 6   | C      | 0.0085115              | -1.8893493 | 0.000317   |
| 7   | C      | -0.0085115             | 1.8893494  | 0.0001541  |
| 8   | C      | -1.3493331             | 2.1768314  | 0.0002457  |
| 9   | C      | -2.3018626             | 1.122762   | 0.0001944  |
| 10  | C      | -1.8476048             | -0.2062904 | 0.0001822  |
| 11  | C      | -3.7368012             | 1.2115612  | -0.0001336 |
| 12  | C      | 3.7368012              | -1.2115612 | -0.0001876 |
| 13  | H      | 1.6908486              | -3.2077915 | 0.000526   |
| 14  | H      | -0.7149525             | -2.6992408 | 0.0003939  |
| 15  | H      | 0.7149525              | 2.6992408  | 0.0001302  |
| 16  | H      | -1.6908486             | 3.2077916  | 0.0003205  |
| 17  | H      | 4.2789131              | -2.1504516 | -0.0000132 |
| 18  | H      | -4.2789131             | 2.1504516  | -0.0000174 |
| 19  | S      | 3.1980803              | 1.3275891  | -0.0003024 |
| 20  | S      | -3.1980804             | -1.3275892 | -0.0000516 |
| 21  | C      | -4.341265              | -0.0053343 | -0.0002678 |
| 22  | C      | 4.341265               | 0.0053342  | -0.0004528 |
| 23  | H      | -5.4002839             | -0.2237069 | -0.0005046 |
| 24  | H      | 5.4002838              | 0.2237069  | -0.0007535 |

**Table S6** Geometrical coordinates of the optimized **N[b]DT-4** by DFT at the B3LYP/6-31G(d,p) level

Cartesian coordinates:

| Tag | Symbol | Coordinates(Angstroms) |            |            |
|-----|--------|------------------------|------------|------------|
|     |        | X                      | Y          | Z          |
| 1   | C      | 1.6917038              | 1.9250514  | -0.000057  |
| 2   | C      | 2.4282741              | 0.7223093  | -0.0000076 |
| 3   | C      | 1.8037139              | -0.5359173 | 0.0000771  |
| 4   | C      | 0.3711846              | -0.611109  | 0.000044   |
| 5   | C      | -0.3711846             | 0.611109   | -0.000022  |
| 6   | C      | 0.3185596              | 1.8578367  | -0.0000615 |
| 7   | C      | -0.3185596             | -1.8578367 | 0.0001042  |
| 8   | C      | -1.6917038             | -1.9250514 | 0.0000821  |
| 9   | C      | -2.4282741             | -0.7223093 | 0.0000016  |
| 10  | C      | -1.8037139             | 0.5359173  | -0.0000161 |
| 11  | C      | -2.7657729             | 1.605965   | -0.0000468 |
| 12  | C      | 2.7657729              | -1.605965  | 0.0001693  |
| 13  | H      | 2.1986423              | 2.8847239  | -0.0001116 |
| 14  | H      | -0.2550394             | 2.7784596  | -0.0001141 |
| 15  | H      | 0.2550394              | -2.7784596 | 0.0001512  |
| 16  | H      | -2.1986423             | -2.8847239 | 0.0001049  |
| 17  | H      | 2.5086419              | -2.6581052 | 0.0001952  |
| 18  | H      | -2.5086419             | 2.6581052  | -0.000113  |
| 19  | S      | -4.1747696             | -0.5740717 | -0.0000875 |
| 20  | S      | 4.1747696              | 0.5740717  | -0.0000412 |
| 21  | C      | -4.0529662             | 1.1669774  | -0.0000815 |
| 22  | C      | 4.0529662              | -1.1669773 | 0.0001244  |
| 23  | H      | 4.9550324              | -1.7631371 | 0.0001842  |
| 24  | H      | -4.9550324             | 1.7631371  | -0.0000989 |

**Table S7** Geometrical coordinates of the optimized chrysene by DFT at the B3LYP/6-31G(d,p) level

Cartesian coordinates:

| Tag | Symbol | Coordinates(Angstroms) |            |            |
|-----|--------|------------------------|------------|------------|
|     |        | X                      | Y          | Z          |
| 1   | C      | -4.6726097             | 0.073772   | 0.000045   |
| 2   | C      | -3.8048989             | 1.1446133  | 0.0000298  |
| 3   | C      | -2.4026163             | 0.9470746  | 0.0000152  |
| 4   | C      | -1.8705008             | -0.3776312 | 0.0000042  |
| 5   | C      | -2.7925598             | -1.4551164 | 0.0000272  |
| 6   | C      | -4.1563049             | -1.2375904 | 0.0000475  |
| 7   | C      | -1.5039585             | 2.0550422  | 0.0000158  |
| 8   | C      | -0.4295459             | -0.564071  | -0.0000002 |
| 9   | C      | 0.4295576              | 0.5640628  | -0.000011  |
| 10  | C      | -0.152837              | 1.8711812  | 0.0000021  |
| 11  | C      | 1.870483               | 0.3776401  | -0.0000654 |
| 12  | C      | 1.5039663              | -2.0550276 | 0.0000409  |
| 13  | C      | 0.1528268              | -1.8711657 | 0.000009   |
| 14  | H      | -1.9183551             | 3.059692   | 0.0000202  |
| 15  | H      | -5.7462622             | 0.2362301  | 0.0000592  |
| 16  | H      | -4.1855278             | 2.1626951  | 0.000035   |
| 17  | H      | -2.4340077             | -2.4775932 | 0.0000363  |
| 18  | H      | -4.8352485             | -2.085249  | 0.000066   |
| 19  | H      | 0.4892961              | 2.7434669  | -0.0000037 |
| 20  | H      | -0.4892912             | -2.743464  | 0.000001   |
| 21  | C      | 2.4026142              | -0.9470859 | 0.0000002  |
| 22  | C      | 2.7925649              | 1.4551297  | -0.0000762 |
| 23  | H      | 2.4339975              | 2.4776019  | -0.0000096 |
| 24  | C      | 4.1562951              | 1.2375884  | 0.0000036  |
| 25  | H      | 4.8352629              | 2.0852291  | 0.0000551  |
| 26  | C      | 4.6726109              | -0.0737914 | -0.0000779 |
| 27  | C      | 3.8049137              | -1.1446222 | -0.0000527 |
| 28  | H      | 5.7462698              | -0.2362207 | -0.0001101 |
| 29  | H      | 4.1855258              | -2.1627128 | 0.0000603  |
| 30  | H      | 1.9183369              | -3.0596904 | 0.0000475  |
